# Supplementary material for: Pirating conserved phage mechanisms promotes promiscuous staphylococcal pathogenicity island transfer
Source: eLife journal article supplement (doi:10.7554/elife.26487), 2017-08-08
Supplement: supp [file elife-26487-supp-v1.zip]

Archive with 21 entries (21 files):
- elife_poa_e26487_Table_1_source_data_1.xlsx
- elife_poa_e26487_Supplementary_File_7.docx
- elife_poa_e26487_Supplementary_File_5.docx
- elife_poa_e26487_Supplementary_File_4.docx
- elife_poa_e26487_Supplementary_File_1.docx
- elife_poa_e26487_Supplementary_File_8.docx
- elife_poa_e26487_Figure_5_figure_supplement_2.pdf
- elife_poa_e26487_Figure_5_figure_supplement_3.pdf
- elife_poa_e26487_Supplementary_File_2.docx
- elife_poa_e26487_Figure_1_figure_supplement_1.pdf
- elife_poa_e26487_Transparent_Reporting_File.docx
- elife_poa_e26487_Figure_5_figure_supplement_1.pdf
- elife_poa_e26487_Supplementary_File_6.docx
- elife_poa_e26487_Figure_1_source_data_1.xlsx
- elife_poa_e26487_Figure_4_figure_supplement_1.pdf
- elife_poa_e26487_Supplementary_File_3.docx
- elife_poa_e26487_Figure_2_figure_supplement_1.pdf
- elife_poa_e26487_Figure_5_figure_supplement_4.pdf
- elife_poa_e26487_Table_2_source_data_1.xlsx
- elife_poa_e26487_Figure_6_source_data_2.xlsx
- elife_poa_e26487_Figure_6_source_data_1.xlsx
