# Supplementary material for: Pirating conserved phage mechanisms promotes promiscuous staphylococcal pathogenicity island transfer
Source: eLife journal article supplement (doi:10.7554/elife.26487), 2017-08-08
Supplement: supp [file elife-26487-supp-v1.zip › elife_poa_e26487_Figure_1_figure_supplement_1.pdf]

0 1 2 3 4 5 6 7 8 9 10

|             | .....10.....20.....30.....40.....50                      |
|-------------|----------------------------------------------------------|
| NM1         | MTNTLTIDQL QELLQIQKEF DDRIPTLNLR DSKIAYVVEF FEWFNTLETF   |
| O11         | MTNTLTIDQL QELLQIQKEF DDRIPTLNLR DSKIAYVVEF FEWFNTLETF   |
| Consistency | *****                                                    |
|             | .....60.....70.....80.....90.....100                     |
| NM1         | KNWKKKPGKP LDVQLDELAD MLAFGLSIAN QVGVSSSEEEK EAIES SFKDT |
| O11         | KNWKKKPGKP LDVQLDELAD MLAFGLSIAN QSGVSLKLTLE KLTPS----   |
| Consistency | *****2***2537553*3*00000                                 |
|             | .....110.....120.....130.....140.....150                 |
| NM1         | EFHKMFNFKD KEFAQDAVVS TPQITFKEFY PDQQAIVIVI DIAYNLYSID   |
| O11         | TLGKVY-FNT SSIMKDFMED FVYFGLGEED SLSLPLNIAY NL----YSID   |
| Consistency | 341*560*4344435*25242234042*103042371*53570000****       |
|             | .....160.....170.....                                    |
| NM1         | QLIDAYKKKM KRNHERQDGT ADAGKGYV                           |
| O11         | QLIDAYKKKM KRNHERQDGT ADAGKGYV                           |
| Consistency | *****                                                    |

**Figure 1- figure supplement 1. Sequence alignment for the  $\phi$ NM1 (accession number ABF73061) and  $\phi$ O11 (accession number EGA96175) dimeric dUTPases.**

Colours indicate relative sequence conservation at each position, with red being most conserved and violet being least (adapted from alignment generated by PRALINE).
