# Supplementary material for: Pirating conserved phage mechanisms promotes promiscuous staphylococcal pathogenicity island transfer
Source: eLife journal article supplement (doi:10.7554/elife.26487), 2017-08-08
Supplement: supp [file elife-26487-supp-v1.zip › elife_poa_e26487_Figure_1_source_data_1.xlsx]

## Sheet: Raw data of figure 1B
Data related to figure 1B
		- Cadmium						+ Cadmium
O11		0.669266	1.68181	1.63672	1.83811	2.80752		2.88342	7.5253	4.81247	4.578	9.34538
pCN51		0.103629	0.167354	0.01161	0.083715	0.011708		0.268578	0.928075	-0.04401	0.120913	0.237617
														all measured as Units/ml
Statisitics using two way ANOVA
Compare each cell mean with the other cell mean in that row.												Table Analyzed	Data 1
Number of families	1											Two-way ANOVA	Ordinary
Number of comparisons per family	2											Alpha	0.05
Alpha	0.05
												Source of Variation	% of total variation	P value	P value summary	Significant?
Sidak's multiple comparisons test	Mean Diff.	95% CI of diff.	Significant?	Summary	Adjusted P Value							Interaction	13.81	0.0056	**	Yes
												Row Factor	47.36	< 0.0001	****	Yes
- Cadmium - + Cadmium												Column Factor	17.22	0.0026	**	Yes
O11	-4.102	-6.217 to -1.988	Yes	***	0.0004
pCN51	-0.2266	-2.341 to 1.888	No	ns	0.9579							ANOVA table	SS	DF	MS	F (DFn, DFd)	P value
												Interaction	18.78	1	18.78	F (1, 16) = 10.22	P = 0.0056
												Row Factor	64.4	1	64.4	F (1, 16) = 35.06	P < 0.0001
Test details	Mean 1	Mean 2	Mean Diff.	SE of diff.	N1	N2	t	DF				Column Factor	23.42	1	23.42	F (1, 16) = 12.75	P = 0.0026
												Residual	29.39	16	1.837
- Cadmium - + Cadmium
O11	1.727	5.829	-4.102	0.8572	5	5	4.785	16				Number of missing values	0
pCN51	0.0756	0.3022	-0.2266	0.8572	5	5	0.2644	16
