# Supplementary material for: Pirating conserved phage mechanisms promotes promiscuous staphylococcal pathogenicity island transfer
Source: eLife journal article supplement (doi:10.7554/elife.26487), 2017-08-08
Supplement: supp [file elife-26487-supp-v1.zip › elife_poa_e26487_Figure_2_figure_supplement_1.pdf]

**A**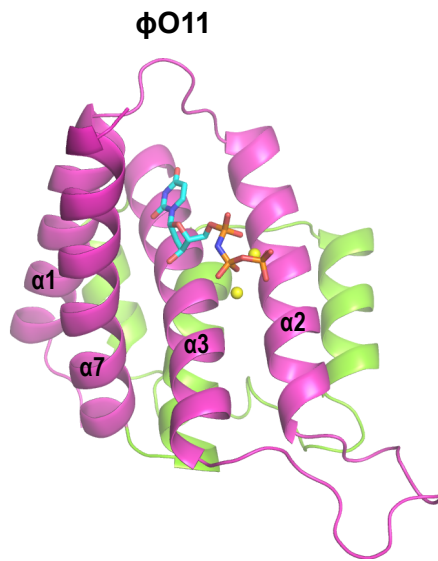

***L. major***  
**PDB: 2YAY**

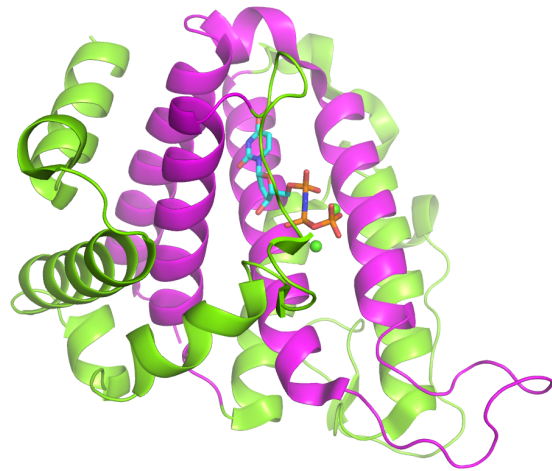**B**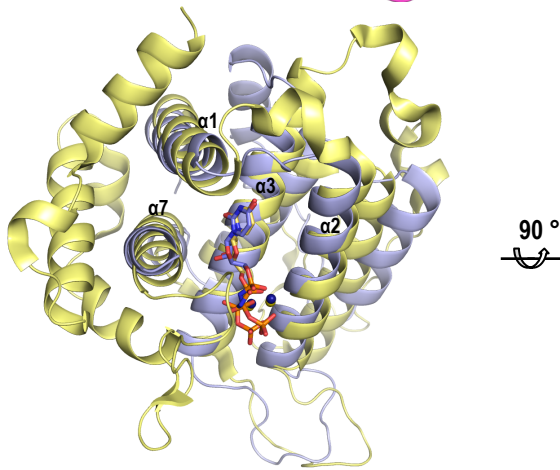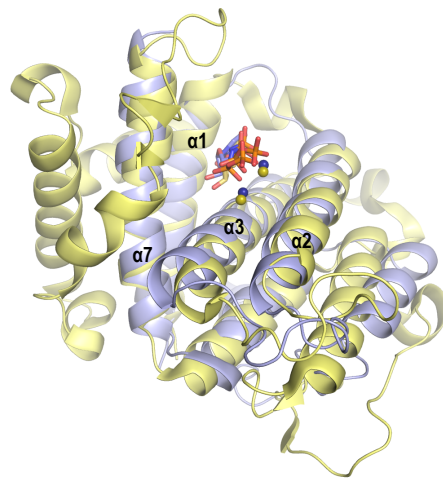**C**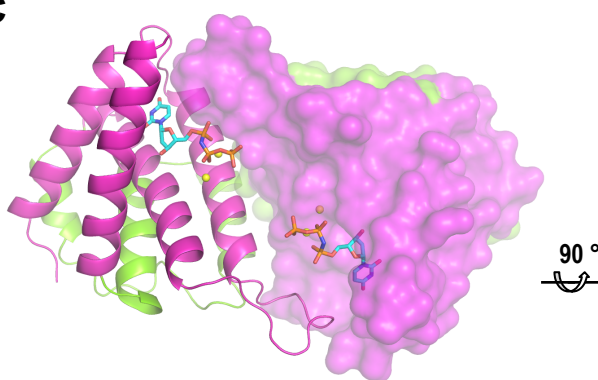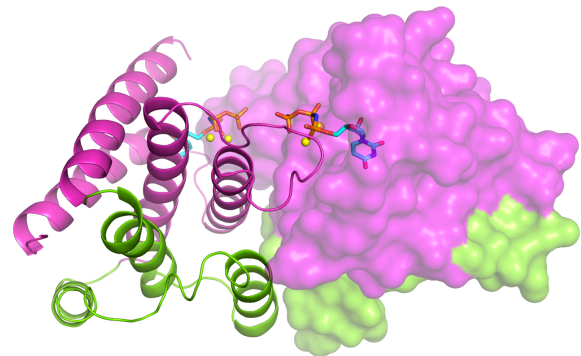

**Figure 2- figure supplement 1. φO11 Dut represents a reduced version of dimeric Duts.**

- (A) Cartoon representation of protomers from φO11 and *Leishmania major* (PDB2YAY) dimeric Duts. The four helices defining the conserved structural core that generate the nucleotide-binding site in these dimeric Duts are coloured in magenta and the corresponding secondary structural elements are labelled in φO11. The variable regions in the dimeric Duts are coloured in green. The nucleotides bound in the active centres are represented in sticks.
- (B) Two orthogonal views of the superimposed φO11 (blue) and *L. major* (yellow) protomers showing the similar spatial disposition of the conserved structural core.
- (C) Two orthogonal views of the φO11 dimer (one protomer in cartoon and the other in surface) showing that the conserved structural core (coloured in magenta) is oriented in the same face of the molecule forming the active centres where two molecules of nucleotide are accommodated (shown in stick representation). The opposite face of the molecule is occupied by the variable protein regions (coloured in green).
