# Supplementary material for: Pirating conserved phage mechanisms promotes promiscuous staphylococcal pathogenicity island transfer
Source: eLife journal article supplement (doi:10.7554/elife.26487), 2017-08-08
Supplement: supp [file elife-26487-supp-v1.zip › elife_poa_e26487_Figure_4_figure_supplement_1.pdf]

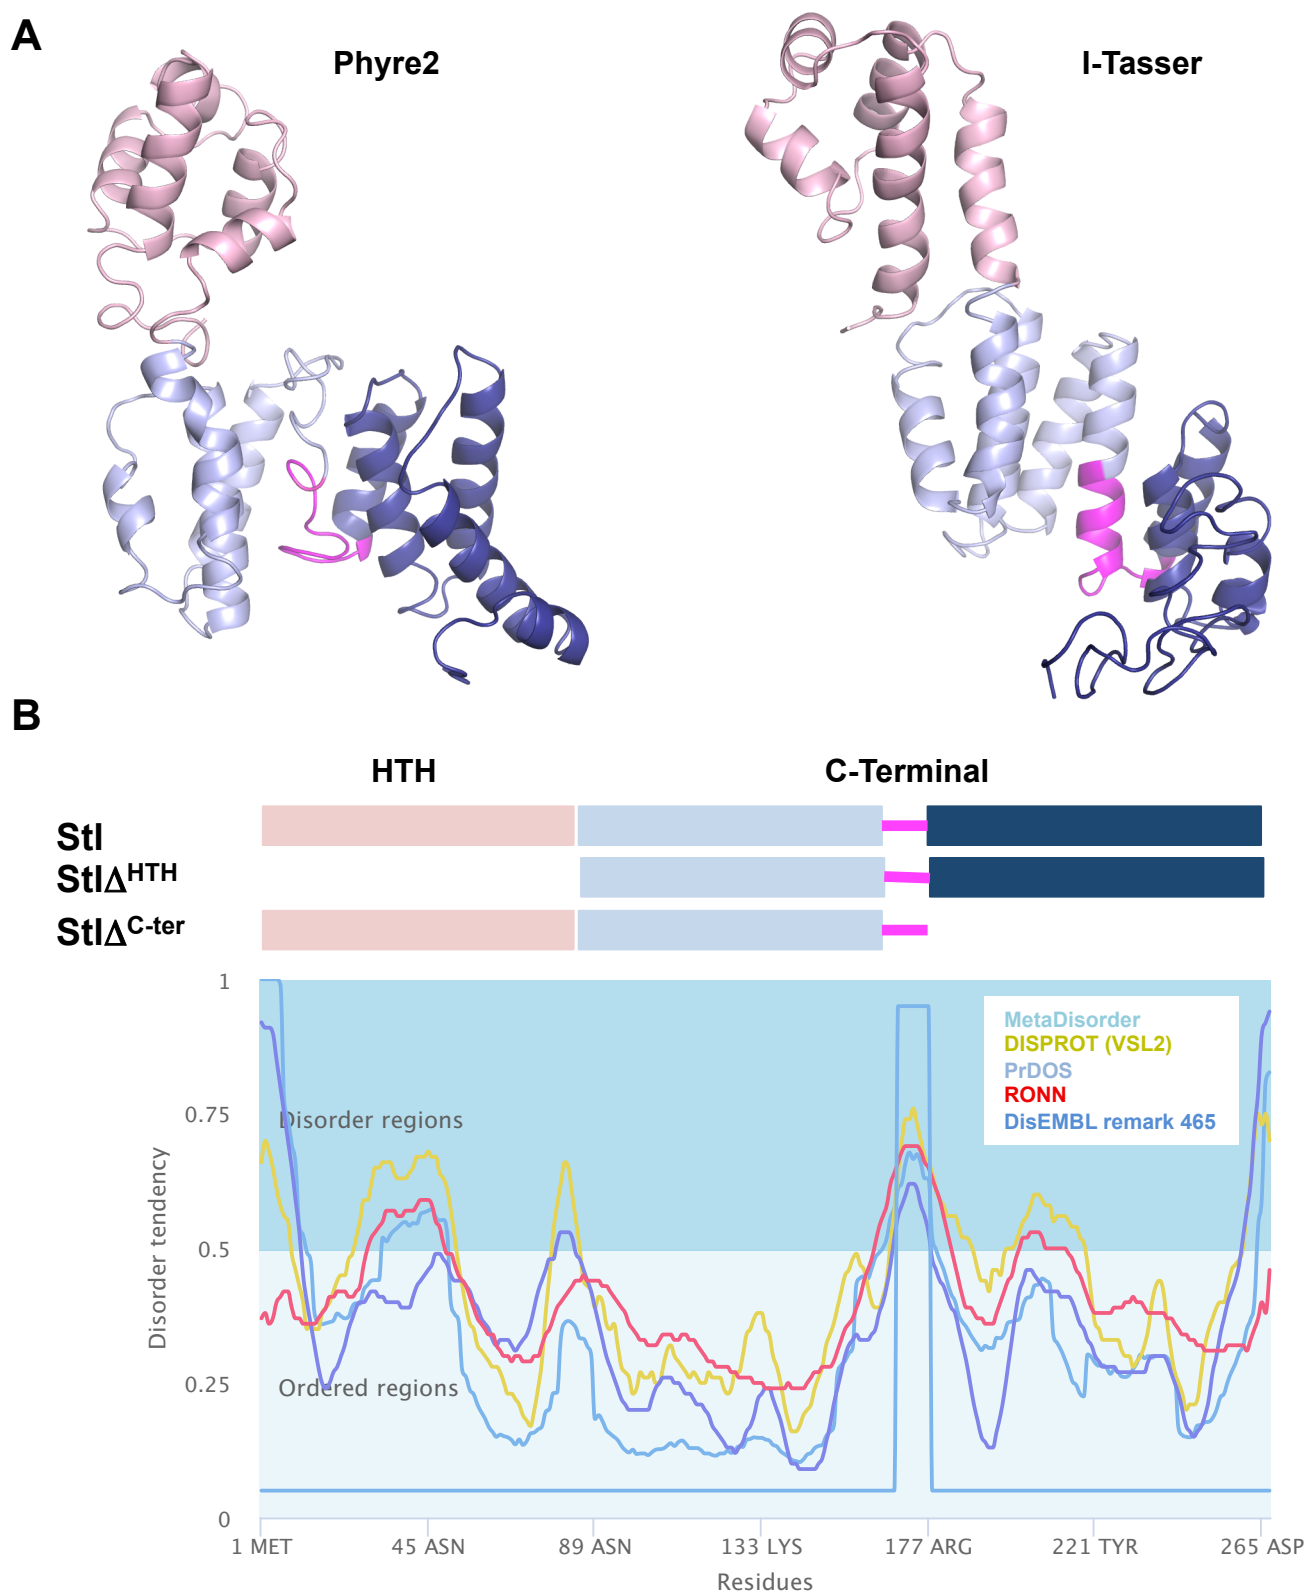

**Figure 4- figure supplement 1. Stl models and constructs design.**

- (A) Cartoon representation of SaPIbov1 Stl models produced by Phyre2 and I-Tasser servers. Both servers predict models with high  $\alpha$  helical content that can be divided into a N-terminal HTH domain (pink) and a C-terminal portion (light and dark blue) separated by a region of low complexity (magenta) as is predicted by the Metadisorder server.
- (B) Based on these predictions, two deletional Stl constructs were designed: Stl $\Delta^{HTH}$ , lacking the N-terminal HTH domain, and Stl $\Delta^{C-ter}$  lacking the C-terminal portion after the predicted disorder region.
