# Supplementary material for: Pirating conserved phage mechanisms promotes promiscuous staphylococcal pathogenicity island transfer
Source: eLife journal article supplement (doi:10.7554/elife.26487), 2017-08-08
Supplement: supp [file elife-26487-supp-v1.zip › elife_poa_e26487_Figure_5_figure_supplement_1.pdf]

#### ORF16

MTEQTLFEQLNSKNVNDHTEQKNGLTYLAWSYAHQELKKIDPNYTVKVHEFPHPDINTENYF  
VPYLATPEGYFVQVSVTVKDDSTETEWLPVLDFRNKSLAKGSATTFDINKAQKRCFVKASALH  
GLGLYIYNGEELPSASDNDITELEERINQFVNLSQEKGRDATIDKT**MRWLKISNINKLSQKQIA**  
**EAHQKLDAGLKQLDSEEKQ\***

#### ORF17 (ssb)

MLNRTVLVGRLTKDPEYRTTPNGVSVTTFTIAVNRTFTNAQGEREADFINCVTFRKQAENVNN  
YLSKGSAGVDGRLQSRSYENKDGQRFVTEVVADSVQFLEPKNNNQPNNNYHQQRQTQ  
TGNNPFDNTTAIDDDLPF\*

#### Chimera 16-17

MTEQTLFEQLNSKNVNDHTEQKNGLTYLAWSYAHQELKKIDPNYTVKVHEFPHPDINTENYF  
VPYLATPEGYFVQVSVTVKDDSTETEWLPVLDFRNKSLAKGSATTFDINKAQKRCFVKASALH  
GLGLYIYNGEELPSASDNDITELEERINQFVNLSQEKGRDATIDKT**RGETI**MLNRTVLVGRLTK  
DPEYRTTPNGVSVTTFTIAVNRTFTNAQGEREADFINCVTFRKQAENVNNYLSKGSAGVDG  
RLQSRSYENKDGQRFVTEVVADSVQFLEPKNNNQPNNNYHQQRQTQTGNNPFDNTTAI  
DDLDPF\*

#### Figure 5- figure supplement 1. Sequence of the chimeric ORF16-17 protein.

Top: sequence of the ORF16 coded protein. The C-terminal part of the protein that is lost in the chimeric protein is highlighted in bold.

Middle: Sequence of the Ssb (ORF17) protein.

Bottom: Sequence of the chimeric protein. In red is shown the novel sequence generated as a consequence of the mutation, that serves to link the ORF16 and ORF17 encoded proteins.
