# Supplementary material for: Pirating conserved phage mechanisms promotes promiscuous staphylococcal pathogenicity island transfer
Source: eLife journal article supplement (doi:10.7554/elife.26487), 2017-08-08
Supplement: supp [file elife-26487-supp-v1.zip › elife_poa_e26487_Figure_5_figure_supplement_2.pdf]

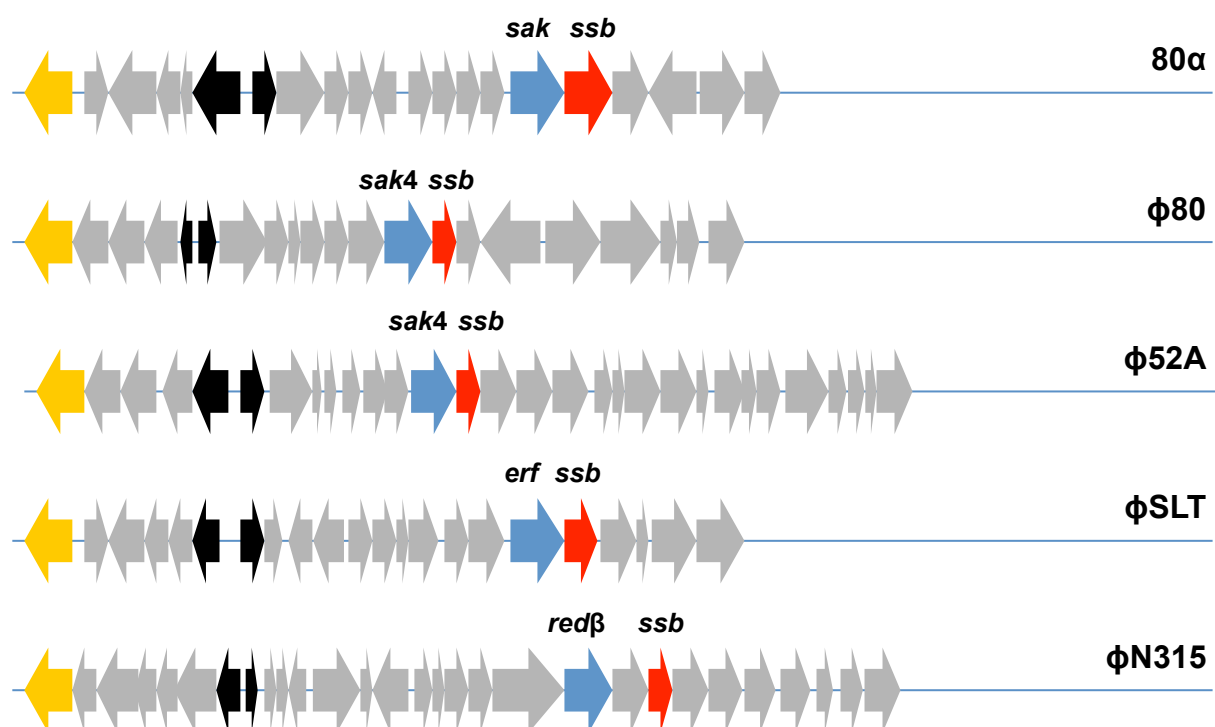

**Figure 5- figure supplement 2. Localisation of the recombinase and *ssb* genes in different staphylococcal phage genomes.**

The 5' regions of phages 80α (NC\_009526), φ80 (DQ908929), φ52A (AY954965), φSLT (AB045978) and φN315 (NC\_004740) are shown. Yellow: integrase (*int*); black: regulatory module; blue: *ssap* genes; red: *ssb* genes; grey: other genes.
