# Supplementary material for: Pirating conserved phage mechanisms promotes promiscuous staphylococcal pathogenicity island transfer
Source: eLife journal article supplement (doi:10.7554/elife.26487), 2017-08-08
Supplement: supp [file elife-26487-supp-v1.zip › elife_poa_e26487_Figure_5_figure_supplement_3.pdf]

Unconserved 0 1 2 3 4 5 6 7 8 9 10 Conserved

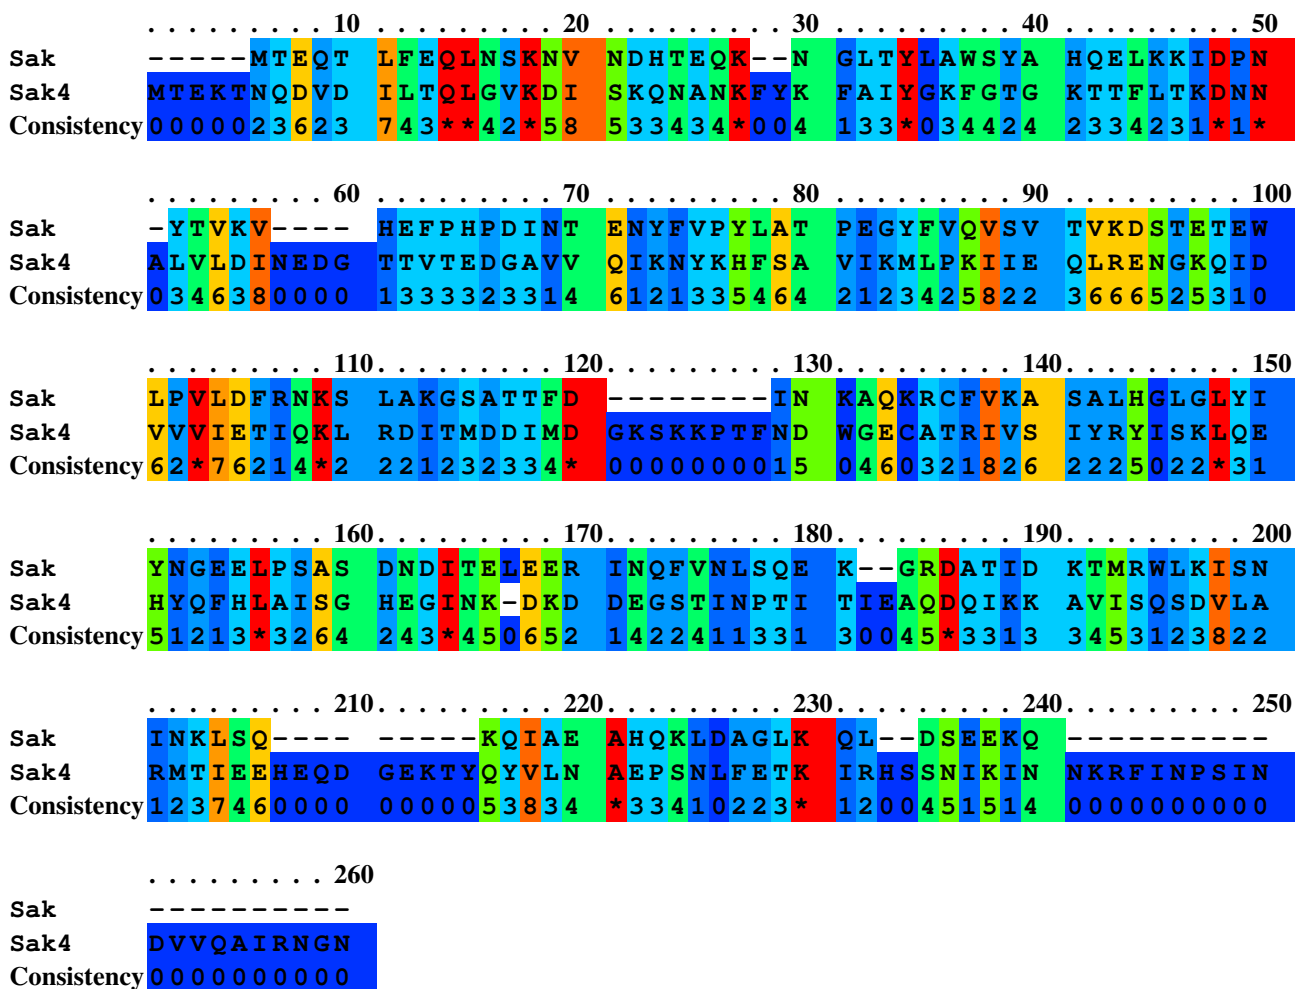

**Figure 5- figure supplement 3. Alignment of predicted Sak (80α) and Sak4 (φ52A) staphylococcal phage SSAPs.**

Colours indicate relative sequence conservation at each position, with red being most conserved and violet being least (adapted from alignment generated by PRALINE).
