# Supplementary material for: Pirating conserved phage mechanisms promotes promiscuous staphylococcal pathogenicity island transfer
Source: eLife journal article supplement (doi:10.7554/elife.26487), 2017-08-08
Supplement: supp [file elife-26487-supp-v1.zip › elife_poa_e26487_Figure_5_figure_supplement_4.pdf]

Unconserved 0 1 2 3 4 5 6 7 8 9 10 Conserved

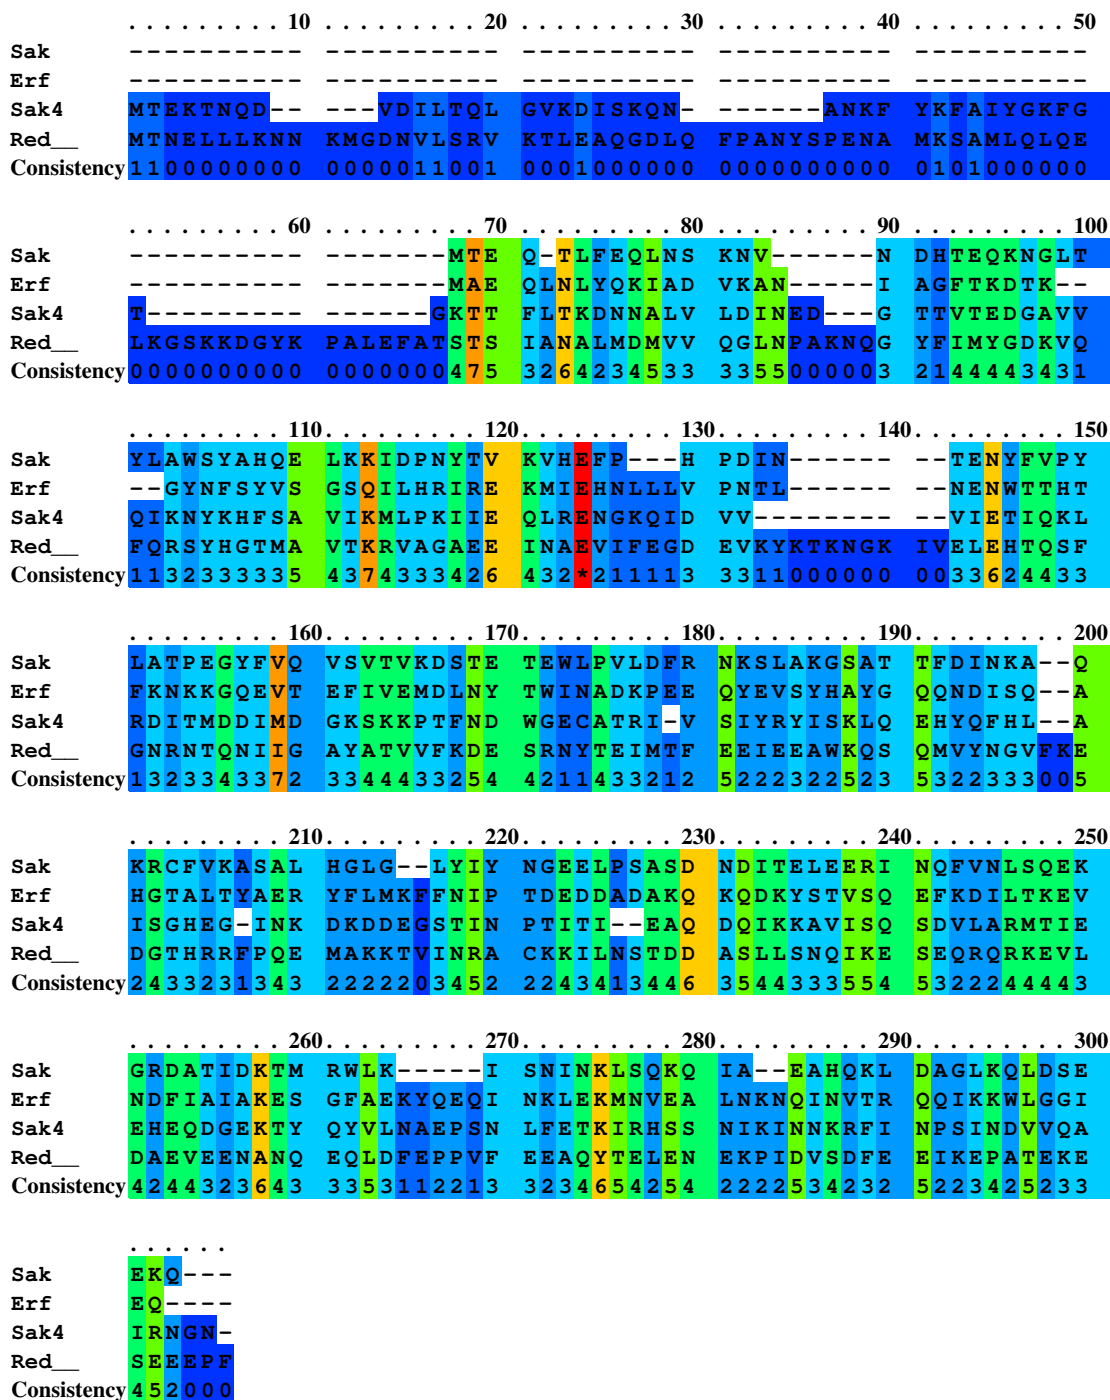

Figure 5- figure supplement 4. Alignment of predicted staphylococcal phage SSAPs.

Colours indicate relative sequence conservation at each position, with red being most conserved and violet being least (adapted from alignment generated by PRALINE).
