# Supplementary material for: Pirating conserved phage mechanisms promotes promiscuous staphylococcal pathogenicity island transfer
Source: eLife journal article supplement (doi:10.7554/elife.26487), 2017-08-08
Supplement: supp [file elife-26487-supp-v1.zip › elife_poa_e26487_Figure_6_source_data_1.xlsx]

## Sheet: Raw data of figure 6A
Raw data of figure 6A
[ProtocolDescr]
Name=C:\MY DOCUMENTS\ANDREAS\KINETICS 30 MIN OD490 ONLY.PRT
Modified=Yes
[ReadingParameters]
ShakingIntensity=2
ShakingTime=2
ShakingType=Before each Read
Pre-Heating=Yes
Incubation=Yes
Temperature=37
LagTime=00:00:00
KineticRunTime=00:30:00
KineticInterval=00:00:20
ReadBlankPlate=No
MonitorWell=No
Filter1=490
		1	2	3	4	5	6	7	8	9	10	11	12
T0	A	1	1	1	2	2	2	3	3	3	4	4	4	Rps2+Sak	1	Rps2: RN4220 + pCU1_SaPI2_stl-str_blaZ + pCN51_recombinase
	B							5	5	5	6	6	6	Rps2+Sak4	2
NT3	C	1	1	1	2	2	2	3	3	3	4	4	4	Rps2+Erf	3
	D							5	5	5	6	6	6	Rps2+Redβ	4
IT0	E	1	1	1	2	2	2	3	3	3	4	4	4	Rps2+Chimera	5
	F							5	5	5	6	6	6	Rps2+pCN51	6
	G
	H												C
[Plate: Mean V]
	1	2	3	4	5	6	7	8	9	10	11	12
A	1.3014	1.3104	1.3337	0.9563	0.9836	0.9684	0.8139	0.7547	0.8345	1.7024	1.6591	1.6112
B							1.2106	1.2098	1.2206	1.302	1.3277	1.2057
C	5.7217	5.9449	5.3369	15.008	13.524	13.766	4.5295	4.5522	4.3909	6.2564	6.1602	6.3076					OD540
D							7.8779	7.7583	7.4375	6.6089	6.5889	6.5261						1	2	3	4	5	6	7	8	9	10	11	12
E	5.7252	5.5663	5.4557	15.456	14.819	15.219	11.25	11.13	10.787	15.278	15.427	16.164					A	0.17	0.17	0.17	0.17	0.17	0.17	0.15	0.15	0.15	0.15	0.15	0.15
F							3.3687	3.6471	3.4859	3.5622	3.5329	3.916					B							0.19	0.19	0.19	0.2	0.2	0.2
																	C	0.72	0.72	0.72	0.9	0.9	0.9	0.8	0.8	0.8	0.69	0.69	0.69
																	D							0.79	0.79	0.79	0.76	0.76	0.76
																	E	0.62	0.62	0.62	0.64	0.64	0.64	0.53	0.53	0.53	0.71	0.71	0.71
[Plate: Coeff Reg]																	F							0.61	0.61	0.61	0.65	0.65	0.65
	1	2	3	4	5	6	7	8	9	10	11	12
A	0.9824	0.9753	0.9816	0.9528	0.9567	0.9577	0.9498	0.9402	0.9551	0.9856	0.9847	0.9896
B							0.9477	0.9108	0.893	0.9259	0.9924	0.9433
C	0.9962	0.996	0.9952	0.9982	0.9982	0.9983	0.993	0.9926	0.987	0.9932	0.9898	0.9807
D							0.9975	0.9975	0.9962	0.9928	0.9938	0.9922
E	0.9953	0.9972	0.9967	0.999	0.9986	0.9991	0.9982	0.9983	0.9984	0.998	0.9983	0.999					Dilution factors
F							0.9979	0.9974	0.9968	0.9958	0.9966	0.9867						1	2	3	4	5	6	7	8	9	10	11	12
																	A	1	1	1	1	1	1	1	1	1	1	1	1
																	B							1	1	1	1	1	1
																	C	4	4	4	4	4	4	4	4	4	4	4	4
[Table:TABLE Delta OD Corr. ]																	D							4	4	4	4	4	4
Time	A1	A2	A3	A4	A5	A6	A7	A8	A9	A10	A11	A12					E	4	4	4	4	4	4	4	4	4	4	4	4
00:00:00	0.045	0.042	0.044	0.046	0.046	0.043	0.045	0.042	0.045	0.045	0.046	0.041					F							4	4	4	4	4	4
00:00:20	0.043	0.045	0.044	0.047	0.043	0.046	0.044	0.046	0.042	0.047	0.042	0.043
00:00:40	0.044	0.044	0.046	0.046	0.046	0.042	0.046	0.043	0.044	0.044	0.046	0.041
00:01:00	0.044	0.048	0.043	0.05	0.045	0.047	0.043	0.045	0.042	0.048	0.042	0.044
00:01:20	0.046	0.041	0.047	0.048	0.047	0.043	0.046	0.042	0.047	0.045	0.046	0.042
00:01:40	0.045	0.045	0.043	0.051	0.044	0.047	0.043	0.047	0.043	0.048	0.043	0.045
00:02:00	0.047	0.041	0.046	0.048	0.047	0.044	0.046	0.043	0.045	0.046	0.046	0.042					Slopes
00:02:20	0.046	0.044	0.044	0.05	0.044	0.045	0.043	0.046	0.041	0.047	0.043	0.045						1	2	3	4	5	6	7	8	9	10	11	12
00:02:40	0.047	0.042	0.046	0.049	0.048	0.043	0.044	0.043	0.043	0.044	0.046	0.043					A	0.07349	0.07367	0.07532	0.05322	0.05413	0.05255	0.0432	0.03905	0.04426	0.0977	0.09535	0.09217
00:03:00	0.047	0.044	0.044	0.05	0.044	0.045	0.043	0.045	0.042	0.047	0.044	0.044					B							0.06824	0.06824	0.0684	0.07388	0.07505	0.06843
00:03:20	0.046	0.041	0.044	0.047	0.044	0.041	0.043	0.041	0.043	0.044	0.046	0.043					C	0.3393	0.3524	0.3156	0.2176	0.2148	0.2204	0.2668	0.2684	0.2586	0.3707	0.3648	0.3738
00:03:40	0.046	0.045	0.045	0.05	0.043	0.045	0.042	0.045	0.042	0.048	0.045	0.045					D							0.1409	0.1372	0.1615	0.2362	0.1679	0.2009
00:04:00	0.046	0.044	0.046	0.047	0.046	0.043	0.045	0.042	0.045	0.047	0.049	0.044					E	0.6015	0.5963	0.625	0.7081	0.6657	0.6757	0.4249	0.4312	0.4139	0.6373	0.6358	0.6315
00:04:20	0.047	0.045	0.046	0.048	0.044	0.045	0.043	0.046	0.043	0.049	0.047	0.046					F							0.08919	0.08727	0.07263	0.1045	0.1079	0.1102
00:04:40	0.046	0.045	0.047	0.047	0.046	0.044	0.045	0.043	0.045	0.048	0.049	0.044
00:05:00	0.045	0.046	0.046	0.049	0.045	0.046	0.044	0.046	0.043	0.051	0.048	0.047
00:05:20	0.047	0.044	0.048	0.046	0.045	0.044	0.045	0.043	0.044	0.048	0.049	0.045
00:05:40	0.047	0.047	0.047	0.049	0.045	0.047	0.044	0.046	0.044	0.051	0.048	0.049
00:06:00	0.047	0.044	0.048	0.047	0.046	0.043	0.045	0.043	0.045	0.048	0.05	0.046					OD540 corrected slopes
00:06:20	0.047	0.047	0.047	0.049	0.045	0.047	0.044	0.046	0.043	0.052	0.048	0.049						1	2	3	4	5	6	7	8	9	10	11	12
00:06:40	0.048	0.045	0.049	0.047	0.048	0.045	0.046	0.044	0.046	0.05	0.051	0.047					A	8.64588	8.66706	8.86118	6.26118	6.36824	6.18235	5.76	5.20667	5.90133	13.0267	12.7133	12.2893
00:07:00	0.047	0.048	0.048	0.05	0.045	0.047	0.044	0.047	0.043	0.052	0.048	0.049					B							7.18316	7.18316	7.2	7.388	7.505	6.843
00:07:20	0.049	0.048	0.049	0.049	0.049	0.045	0.048	0.045	0.047	0.051	0.053	0.049					C	37.7	39.1556	35.0667	19.3422	19.0933	19.5911	26.68	26.84	25.86	42.9797	42.2957	43.3391
00:07:40	0.049	0.049	0.048	0.052	0.046	0.048	0.045	0.047	0.045	0.054	0.05	0.05					D							14.2684	13.8937	16.3544	24.8632	17.6737	21.1474
00:08:00	0.049	0.047	0.051	0.049	0.05	0.045	0.047	0.045	0.047	0.053	0.053	0.049					E	77.6129	76.9419	80.6452	88.5125	83.2125	84.4625	64.1358	65.0868	62.4755	71.8085	71.6394	71.1549
00:08:20	0.051	0.051	0.05	0.053	0.048	0.05	0.046	0.049	0.046	0.056	0.053	0.052					F							11.697	11.4452	9.52525	12.8615	13.28	13.5631
00:08:40	0.049	0.048	0.051	0.049	0.049	0.046	0.048	0.045	0.047	0.052	0.055	0.05
00:09:00	0.05	0.051	0.051	0.052	0.048	0.049	0.046	0.048	0.046	0.057	0.053	0.053
00:09:20	0.05	0.048	0.052	0.05	0.05	0.046	0.047	0.045	0.047	0.054	0.055	0.051
00:09:40	0.052	0.052	0.051	0.053	0.049	0.05	0.047	0.048	0.046	0.058	0.054	0.054						Rps2+Sak	Rps2+Sak4	Rps2+Erf	Rps2+Redβ	Rps2+Chi	Rps2+pCN51
00:10:00	0.051	0.049	0.053	0.05	0.05	0.048	0.048	0.046	0.048	0.056	0.057	0.052				T0	T0	8.72471	6.27059	5.62267	12.6764	7.18877	7.24533
00:10:20	0.052	0.053	0.052	0.054	0.049	0.051	0.048	0.049	0.047	0.059	0.056	0.055				NT3	180 min - CdCl2	37.3074	19.3422	26.46	42.8715	18.3704	21.2281
00:10:40	0.054	0.051	0.055	0.052	0.052	0.049	0.049	0.047	0.05	0.057	0.058	0.054				IT3	180 min + CdCl2	78.4	85.3958	63.8994	71.5343	10.8892	13.2349
00:11:00	0.053	0.054	0.053	0.055	0.05	0.051	0.048	0.05	0.048	0.06	0.056	0.057
00:11:20	0.053	0.051	0.055	0.052	0.052	0.048	0.049	0.047	0.049	0.057	0.059	0.055
00:11:40	0.056	0.055	0.054	0.056	0.051	0.052	0.049	0.05	0.048	0.061	0.057	0.058
00:12:00	0.055	0.052	0.056	0.053	0.052	0.049	0.05	0.047	0.049	0.059	0.06	0.055		Calculating the Slope for the raw A by Grafpad software
00:12:20	0.057	0.057	0.056	0.057	0.051	0.053	0.049	0.051	0.049	0.064	0.059	0.06		Best-fit values
00:12:40	0.056	0.053	0.058	0.053	0.053	0.05	0.051	0.048	0.05	0.06	0.061	0.057		Slope	0.07349 ± 0.002199	0.07367 ± 0.002754	0.07532 ± 0.002035	0.05322 ± 0.002785	0.05413 ± 0.002424	0.05255 ± 0.002673	0.04320 ± 0.002137	0.03905 ± 0.002481	0.04426 ± 0.002076	0.09770 ± 0.002721	0.09535 ± 0.002303	0.09217 ± 0.002162
00:13:00	0.057	0.057	0.056	0.058	0.052	0.053	0.05	0.052	0.05	0.064	0.06	0.06		Y-intercept when X=0.0	0.04131 ± 0.0004250	0.03989 ± 0.0005322	0.04110 ± 0.0003932	0.04477 ± 0.0005381	0.04190 ± 0.0004684	0.04121 ± 0.0005165	0.04152 ± 0.0004130	0.04175 ± 0.0004795	0.04089 ± 0.0004011	0.04172 ± 0.0005258	0.04070 ± 0.0004450	0.03911 ± 0.0004178
00:13:20	0.057	0.054	0.058	0.054	0.054	0.051	0.052	0.049	0.051	0.061	0.062	0.058		X-intercept when Y=0.0	-0.5621	-0.5414	-0.5457	-0.8412	-0.7739	-0.7841	-0.9612	-1.069	-0.9237	-0.427	-0.4268	-0.4244
00:13:40	0.058	0.058	0.057	0.058	0.052	0.053	0.05	0.051	0.049	0.065	0.061	0.061		1/slope	13.61	13.57	13.28	18.79	18.47	19.03	23.15	25.61	22.59	10.24	10.49	10.85
00:14:00	0.058	0.056	0.059	0.056	0.056	0.052	0.052	0.049	0.051	0.063	0.064	0.06		95% Confidence Intervals
00:14:20	0.058	0.059	0.058	0.059	0.053	0.055	0.05	0.051	0.05	0.066	0.062	0.062		Slope	0.06909 to 0.07790	0.06816 to 0.07918	0.07125 to 0.07939	0.04765 to 0.05879	0.04928 to 0.05898	0.04720 to 0.05790	0.03892 to 0.04747	0.03408 to 0.04401	0.04011 to 0.04842	0.09226 to 0.1031	0.09074 to 0.09996	0.08784 to 0.09650
00:14:40	0.059	0.057	0.061	0.057	0.057	0.052	0.052	0.049	0.052	0.064	0.066	0.061		Y-intercept when X=0.0	0.04046 to 0.04216	0.03882 to 0.04095	0.04032 to 0.04189	0.04369 to 0.04585	0.04096 to 0.04283	0.04017 to 0.04224	0.04070 to 0.04235	0.04080 to 0.04271	0.04008 to 0.04169	0.04066 to 0.04277	0.03981 to 0.04159	0.03828 to 0.03995
00:15:00	0.06	0.06	0.059	0.06	0.055	0.056	0.052	0.053	0.051	0.068	0.063	0.063		X-intercept when Y=0.0	-0.6089 to -0.5205	-0.5992 to -0.4917	-0.5867 to -0.5088	-0.9596 to -0.7452	-0.8670 to -0.6961	-0.8924 to -0.6958	-1.086 to -0.8592	-1.250 to -0.9294	-1.037 to -0.8298	-0.4625 to -0.3952	-0.4574 to -0.3991	-0.4538 to -0.3975
00:15:20	0.06	0.057	0.061	0.057	0.056	0.054	0.054	0.05	0.053	0.065	0.066	0.061		Goodness of Fit
00:15:40	0.06	0.059	0.06	0.059	0.055	0.056	0.051	0.053	0.051	0.068	0.064	0.064		R square	0.9498	0.9238	0.9587	0.8609	0.8942	0.8676	0.8738	0.8076	0.8852	0.9563	0.9667	0.9686
00:16:00	0.062	0.059	0.063	0.059	0.058	0.053	0.055	0.051	0.053	0.067	0.067	0.063		Sy.x	0.00168	0.002104	0.001554	0.002127	0.001852	0.002042	0.001633	0.001896	0.001586	0.002078	0.001759	0.001652
00:16:20	0.063	0.062	0.061	0.061	0.056	0.057	0.054	0.054	0.053	0.07	0.065	0.066		Is slope significantly non-zero?
00:16:40	0.062	0.059	0.062	0.058	0.058	0.055	0.053	0.051	0.053	0.068	0.068	0.064		F	1117	715.6	1371	365.3	498.8	386.6	408.6	247.7	454.7	1290	1715	1817
00:17:00	0.064	0.063	0.063	0.061	0.057	0.057	0.053	0.056	0.053	0.072	0.067	0.067		DFn, DFd	1.000, 59.00	1.000, 59.00	1.000, 59.00	1.000, 59.00	1.000, 59.00	1.000, 59.00	1.000, 59.00	1.000, 59.00	1.000, 59.00	1.000, 59.00	1.000, 59.00	1.000, 59.00
00:17:20	0.064	0.061	0.065	0.06	0.059	0.057	0.055	0.052	0.056	0.069	0.071	0.065		P value	< 0.0001	< 0.0001	< 0.0001	< 0.0001	< 0.0001	< 0.0001	< 0.0001	< 0.0001	< 0.0001	< 0.0001	< 0.0001	< 0.0001
00:17:40	0.064	0.063	0.064	0.062	0.058	0.06	0.053	0.056	0.054	0.073	0.068	0.069		Deviation from zero?	Significant	Significant	Significant	Significant	Significant	Significant	Significant	Significant	Significant	Significant	Significant	Significant
00:18:00	0.064	0.062	0.065	0.061	0.061	0.057	0.057	0.053	0.057	0.071	0.072	0.067		Data
00:18:20	0.065	0.066	0.064	0.063	0.059	0.061	0.054	0.057	0.055	0.075	0.07	0.069		Number of X values	61	61	61	61	61	61	61	61	61	61	61	61
00:18:40	0.065	0.063	0.066	0.061	0.061	0.057	0.057	0.054	0.056	0.072	0.072	0.067		Maximum number of Y replicates	1	1	1	1	1	1	1	1	1	1	1	1
00:19:00	0.066	0.066	0.065	0.065	0.059	0.06	0.056	0.057	0.055	0.076	0.072	0.071		Total number of values	61	61	61	61	61	61	61	61	61	61	61	61
00:19:20	0.067	0.065	0.068	0.064	0.063	0.059	0.059	0.053	0.058	0.074	0.074	0.069		Number of missing values	0	0	0	0	0	0	0	0	0	0	0	0
00:19:40	0.068	0.066	0.066	0.066	0.06	0.062	0.056	0.057	0.056	0.076	0.073	0.072
00:20:00	0.067	0.064	0.069	0.063	0.062	0.059	0.059	0.055	0.058	0.074	0.074	0.069		Equation	Y = 0.07349*X + 0.04131	Y = 0.07367*X + 0.03989	Y = 0.07532*X + 0.04110	Y = 0.05322*X + 0.04477	Y = 0.05413*X + 0.04190	Y = 0.05255*X + 0.04121	Y = 0.04320*X + 0.04152	Y = 0.03905*X + 0.04175	Y = 0.04426*X + 0.04089	Y = 0.09770*X + 0.04172	Y = 0.09535*X + 0.04070	Y = 0.09217*X + 0.03911
[Table:TABLE Delta OD Corr. ]
Time	B1	B2	B3	B4	B5	B6	B7	B8	B9	B10	B11	B12
00:00:00							0.042	0.047	0.04	0.052	0.041	0.051
00:00:20							0.048	0.041	0.047	0.047	0.044	0.043
00:00:40							0.043	0.047	0.039	0.051	0.041	0.052		Calculating the Slope for the raw B by Grafpad software
00:01:00							0.048	0.042	0.048	0.048	0.045	0.044		Best-fit values	Too few points	Too few points	Too few points	Too few points	Too few points	Too few points
00:01:20							0.043	0.049	0.041	0.053	0.044	0.053		Slope							0.06824 ± 0.003531	0.06824 ± 0.004095	0.06840 ± 0.005141	0.07388 ± 0.004021	0.07505 ± 0.001311	0.06843 ± 0.003250
00:01:40							0.048	0.042	0.048	0.048	0.044	0.044		Y-intercept when X=0.0							0.04294 ± 0.0006823	0.04215 ± 0.0007913	0.04147 ± 0.0009935	0.04682 ± 0.0007771	0.04128 ± 0.0002534	0.04419 ± 0.0006281
00:02:00							0.044	0.048	0.042	0.053	0.043	0.052		X-intercept when Y=0.0							-0.6292	-0.6177	-0.6062	-0.6336	-0.5501	-0.6457
00:02:20							0.047	0.042	0.048	0.047	0.046	0.045		1/slope							14.65	14.65	14.62	13.53	13.33	14.61
00:02:40							0.044	0.048	0.041	0.052	0.044	0.051		95% Confidence Intervals
00:03:00							0.048	0.042	0.049	0.047	0.045	0.043		Slope							0.06118 to 0.07531	0.06005 to 0.07643	0.05811 to 0.07869	0.06584 to 0.08193	0.07242 to 0.07767	0.06193 to 0.07493
00:03:20							0.044	0.049	0.041	0.052	0.045	0.051		Y-intercept when X=0.0							0.04157 to 0.04430	0.04057 to 0.04373	0.03948 to 0.04346	0.04526 to 0.04837	0.04077 to 0.04179	0.04293 to 0.04544
00:03:40							0.05	0.043	0.049	0.048	0.046	0.045		X-intercept when Y=0.0							-0.7218 to -0.5539	-0.7255 to -0.5329	-0.7440 to -0.5043	-0.7321 to -0.5544	-0.5763 to -0.5256	-0.7316 to -0.5746
00:04:00							0.045	0.051	0.043	0.055	0.045	0.051		Goodness of Fit
00:04:20							0.05	0.044	0.049	0.049	0.047	0.046		R square							0.8636	0.8248	0.75	0.8512	0.9823	0.8825
00:04:40							0.046	0.05	0.043	0.056	0.046	0.049		Sy.x							0.002697	0.003128	0.003928	0.003072	0.001002	0.002483
00:05:00							0.051	0.044	0.051	0.05	0.048	0.047		Is slope significantly non-zero?
00:05:20							0.046	0.05	0.043	0.055	0.047	0.051		F							373.6	277.7	177	337.6	3275	443.3
00:05:40							0.051	0.045	0.051	0.05	0.049	0.048		DFn, DFd							1.000, 59.00	1.000, 59.00	1.000, 59.00	1.000, 59.00	1.000, 59.00	1.000, 59.00
00:06:00							0.047	0.05	0.044	0.056	0.047	0.049		P value							< 0.0001	< 0.0001	< 0.0001	< 0.0001	< 0.0001	< 0.0001
00:06:20							0.051	0.045	0.052	0.051	0.05	0.049		Deviation from zero?							Significant	Significant	Significant	Significant	Significant	Significant
00:06:40							0.048	0.053	0.044	0.055	0.049	0.051		Data
00:07:00							0.052	0.046	0.052	0.052	0.05	0.049		Number of X values							61	61	61	61	61	61
00:07:20							0.049	0.053	0.046	0.059	0.049	0.051		Maximum number of Y replicates							1	1	1	1	1	1
00:07:40							0.054	0.047	0.053	0.052	0.051	0.05		Total number of values							61	61	61	61	61	61
00:08:00							0.049	0.053	0.047	0.059	0.051	0.053		Number of missing values							0	0	0	0	0	0
00:08:20							0.056	0.048	0.055	0.054	0.052	0.052
00:08:40							0.049	0.055	0.047	0.06	0.052	0.053		Equation							Y = 0.06824*X + 0.04294	Y = 0.06824*X + 0.04215	Y = 0.06840*X + 0.04147	Y = 0.07388*X + 0.04682	Y = 0.07505*X + 0.04128	Y = 0.06843*X + 0.04419
00:09:00							0.055	0.048	0.055	0.054	0.053	0.052
00:09:20							0.05	0.054	0.047	0.059	0.052	0.053
00:09:40							0.055	0.049	0.056	0.055	0.053	0.053
00:10:00							0.05	0.056	0.048	0.061	0.052	0.056
00:10:20							0.056	0.05	0.057	0.057	0.054	0.055
00:10:40							0.053	0.057	0.05	0.063	0.055	0.055
00:11:00							0.058	0.051	0.057	0.058	0.055	0.057
00:11:20							0.052	0.058	0.049	0.062	0.054	0.057
00:11:40							0.058	0.052	0.058	0.059	0.057	0.056
00:12:00							0.053	0.058	0.05	0.062	0.055	0.058
00:12:20							0.061	0.052	0.06	0.059	0.057	0.057
00:12:40							0.055	0.059	0.051	0.064	0.058	0.061
00:13:00							0.06	0.054	0.06	0.06	0.057	0.058
00:13:20							0.055	0.059	0.052	0.064	0.058	0.06
00:13:40							0.061	0.056	0.061	0.06	0.058	0.059
00:14:00							0.056	0.061	0.053	0.066	0.06	0.06
00:14:20							0.062	0.056	0.061	0.062	0.059	0.061
00:14:40							0.057	0.062	0.053	0.068	0.06	0.062
00:15:00							0.063	0.056	0.063	0.063	0.059	0.061
00:15:20							0.057	0.061	0.055	0.067	0.061	0.063
00:15:40							0.062	0.057	0.062	0.063	0.06	0.062
00:16:00							0.059	0.062	0.057	0.07	0.063	0.064
00:16:20							0.064	0.059	0.065	0.064	0.061	0.063
00:16:40							0.06	0.064	0.058	0.071	0.062	0.062
00:17:00							0.066	0.06	0.065	0.065	0.061	0.064
00:17:20							0.061	0.066	0.058	0.073	0.065	0.065
00:17:40							0.066	0.06	0.066	0.066	0.064	0.066
00:18:00							0.062	0.066	0.059	0.074	0.064	0.065
00:18:20							0.067	0.061	0.067	0.067	0.065	0.066
00:18:40							0.063	0.066	0.06	0.073	0.065	0.067
00:19:00							0.068	0.062	0.068	0.067	0.064	0.066
00:19:20							0.063	0.068	0.062	0.076	0.067	0.068
00:19:40							0.069	0.063	0.067	0.068	0.066	0.068
00:20:00							0.063	0.068	0.062	0.076	0.066	0.068
[Table:TABLE Delta OD Corr. ]
Time	C1	C2	C3	C4	C5	C6	C7	C8	C9	C10	C11	C12
00:00:00	0.04	0.041	0.039	0.027	0.026	0.026	0.039	0.035	0.038	0.035	0.038	0.034
00:00:20	0.037	0.044	0.04	0.028	0.032	0.029	0.035	0.04	0.039	0.037	0.037	0.038		Calculating the Slope for the raw C by Grafpad software
00:00:40	0.041	0.048	0.045	0.032	0.027	0.03	0.04	0.034	0.042	0.035	0.039	0.04		Best-fit values
00:01:00	0.043	0.053	0.043	0.029	0.033	0.027	0.037	0.04	0.04	0.038	0.034	0.041		Slope	0.3393 ± 0.004032	0.3524 ± 0.004466	0.3156 ± 0.004171	0.2176 ± 0.005181	0.2148 ± 0.005205	0.2204 ± 0.006970	0.1409 ± 0.004041	0.1372 ± 0.008119	0.1615 ± 0.005224	0.3707 ± 0.006136	0.3648 ± 0.006858	0.3738 ± 0.01014
00:01:20	0.047	0.046	0.047	0.033	0.03	0.033	0.04	0.036	0.043	0.035	0.039	0.043		Y-intercept when X=0.0	0.03299 ± 0.0007792	0.03510 ± 0.0008630	0.03281 ± 0.0008060	0.02273 ± 0.001001	0.02101 ± 0.001006	0.01994 ± 0.001347	0.02449 ± 0.0007808	0.02183 ± 0.001569	0.02505 ± 0.001010	0.02627 ± 0.001186	0.02550 ± 0.001325	0.02822 ± 0.001960
00:01:40	0.05	0.05	0.042	0.028	0.031	0.024	0.038	0.043	0.038	0.044	0.035	0.043		X-intercept when Y=0.0	-0.09721	-0.0996	-0.104	-0.1045	-0.09782	-0.09047	-0.1738	-0.1592	-0.1552	-0.07089	-0.0699	-0.07549
00:02:00	0.05	0.047	0.047	0.034	0.027	0.033	0.043	0.039	0.044	0.039	0.044	0.044		1/slope	2.947	2.838	3.169	4.595	4.655	4.537	7.099	7.291	6.193	2.698	2.741	2.675
00:02:20	0.049	0.05	0.044	0.025	0.03	0.022	0.04	0.044	0.039	0.045	0.037	0.045		95% Confidence Intervals
00:02:40	0.05	0.049	0.049	0.036	0.029	0.036	0.046	0.041	0.046	0.041	0.046	0.045		Slope	0.3313 to 0.3474	0.3435 to 0.3614	0.3072 to 0.3239	0.2072 to 0.2280	0.2044 to 0.2252	0.2065 to 0.2343	0.1328 to 0.1490	0.1209 to 0.1534	0.1510 to 0.1719	0.3584 to 0.3829	0.3511 to 0.3786	0.3535 to 0.3941
00:03:00	0.051	0.053	0.047	0.029	0.032	0.026	0.043	0.047	0.042	0.048	0.04	0.049		Y-intercept when X=0.0	0.03143 to 0.03454	0.03337 to 0.03683	0.03120 to 0.03443	0.02073 to 0.02474	0.01900 to 0.02303	0.01724 to 0.02263	0.02293 to 0.02605	0.01869 to 0.02497	0.02303 to 0.02707	0.02390 to 0.02865	0.02285 to 0.02816	0.02430 to 0.03214
00:03:20	0.053	0.052	0.051	0.039	0.029	0.037	0.047	0.042	0.049	0.043	0.047	0.045		X-intercept when Y=0.0	-0.1040 to -0.09066	-0.1070 to -0.09257	-0.1118 to -0.09655	-0.1188 to -0.09132	-0.1121 to -0.08474	-0.1090 to -0.07403	-0.1954 to -0.1546	-0.2046 to -0.1229	-0.1784 to -0.1347	-0.07967 to -0.06263	-0.07988 to -0.06060	-0.09042 to -0.06199
00:03:40	0.052	0.057	0.05	0.029	0.035	0.026	0.045	0.051	0.044	0.051	0.043	0.054		Goodness of Fit
00:04:00	0.054	0.057	0.055	0.039	0.031	0.038	0.051	0.046	0.053	0.048	0.053	0.048		R square	0.9917	0.9906	0.9898	0.9676	0.9665	0.9443	0.9537	0.8287	0.9418	0.9841	0.9796	0.9584
00:04:20	0.056	0.06	0.052	0.034	0.039	0.03	0.048	0.055	0.047	0.056	0.047	0.059		Sy.x	0.003081	0.003412	0.003186	0.003958	0.003977	0.005325	0.003087	0.006202	0.003991	0.004688	0.005239	0.007748
00:04:40	0.056	0.061	0.058	0.042	0.033	0.04	0.053	0.049	0.055	0.05	0.057	0.049		Is slope significantly non-zero?
00:05:00	0.058	0.063	0.056	0.036	0.04	0.033	0.051	0.056	0.048	0.06	0.051	0.064		F	7082	6228	5726	1764	1703	999.8	1215	285.4	955.5	3649	2831	1359
00:05:20	0.061	0.064	0.061	0.044	0.035	0.041	0.056	0.051	0.055	0.054	0.059	0.053		DFn, DFd	1.000, 59.00	1.000, 59.00	1.000, 59.00	1.000, 59.00	1.000, 59.00	1.000, 59.00	1.000, 59.00	1.000, 59.00	1.000, 59.00	1.000, 59.00	1.000, 59.00	1.000, 59.00
00:05:40	0.063	0.067	0.059	0.038	0.041	0.034	0.052	0.059	0.05	0.064	0.052	0.068		P value	< 0.0001	< 0.0001	< 0.0001	< 0.0001	< 0.0001	< 0.0001	< 0.0001	< 0.0001	< 0.0001	< 0.0001	< 0.0001	< 0.0001
00:06:00	0.064	0.067	0.063	0.048	0.038	0.045	0.058	0.053	0.058	0.057	0.064	0.055		Deviation from zero?	Significant	Significant	Significant	Significant	Significant	Significant	Significant	Significant	Significant	Significant	Significant	Significant
00:06:20	0.066	0.069	0.062	0.041	0.043	0.036	0.056	0.061	0.053	0.066	0.056	0.071		Data
00:06:40	0.068	0.07	0.067	0.05	0.04	0.049	0.061	0.057	0.062	0.06	0.066	0.06		Number of X values	61	61	61	61	61	61	61	61	61	61	61	61
00:07:00	0.069	0.074	0.066	0.043	0.046	0.038	0.058	0.064	0.055	0.07	0.061	0.075		Maximum number of Y replicates	1	1	1	1	1	1	1	1	1	1	1	1
00:07:20	0.071	0.075	0.071	0.051	0.04	0.049	0.066	0.06	0.065	0.066	0.072	0.064		Total number of values	61	61	61	61	61	61	61	61	61	61	61	61
00:07:40	0.074	0.078	0.068	0.045	0.049	0.039	0.061	0.067	0.059	0.074	0.063	0.08		Number of missing values	0	0	0	0	0	0	0	0	0	0	0	0
00:08:00	0.075	0.079	0.074	0.056	0.045	0.054	0.067	0.062	0.066	0.07	0.075	0.068
00:08:20	0.078	0.082	0.073	0.048	0.05	0.043	0.065	0.072	0.062	0.078	0.069	0.083		Equation	Y = 0.3393*X + 0.03299	Y = 0.3524*X + 0.03510	Y = 0.3156*X + 0.03281	Y = 0.2176*X + 0.02273	Y = 0.2148*X + 0.02101	Y = 0.2204*X + 0.01994	Y = 0.1409*X + 0.02449	Y = 0.1372*X + 0.02183	Y = 0.1615*X + 0.02505	Y = 0.3707*X + 0.02627	Y = 0.3648*X + 0.02550	Y = 0.3738*X + 0.02822
00:08:40	0.079	0.082	0.078	0.056	0.047	0.053	0.071	0.065	0.07	0.073	0.079	0.071
00:09:00	0.079	0.085	0.075	0.05	0.055	0.045	0.067	0.073	0.064	0.082	0.073	0.088
00:09:20	0.082	0.086	0.08	0.061	0.051	0.058	0.072	0.068	0.073	0.076	0.083	0.076
00:09:40	0.086	0.089	0.079	0.053	0.056	0.048	0.07	0.076	0.067	0.087	0.076	0.092
00:10:00	0.087	0.09	0.084	0.062	0.052	0.061	0.077	0.071	0.076	0.081	0.087	0.08
00:10:20	0.088	0.093	0.083	0.055	0.06	0.051	0.073	0.079	0.07	0.09	0.082	0.098
00:10:40	0.092	0.095	0.088	0.063	0.055	0.063	0.08	0.074	0.08	0.086	0.092	0.084
00:11:00	0.092	0.097	0.087	0.058	0.063	0.052	0.076	0.082	0.073	0.095	0.086	0.102
00:11:20	0.094	0.098	0.092	0.065	0.058	0.065	0.082	0.077	0.082	0.089	0.096	0.089
00:11:40	0.099	0.102	0.09	0.061	0.065	0.056	0.079	0.085	0.077	0.099	0.092	0.105
00:12:00	0.099	0.103	0.094	0.067	0.059	0.066	0.086	0.08	0.085	0.094	0.1	0.092
00:12:20	0.103	0.108	0.095	0.063	0.068	0.059	0.082	0.088	0.08	0.105	0.095	0.112
00:12:40	0.103	0.108	0.1	0.071	0.061	0.068	0.088	0.082	0.088	0.099	0.105	0.098
00:13:00	0.105	0.11	0.099	0.066	0.07	0.062	0.085	0.092	0.083	0.108	0.099	0.116
00:13:20	0.107	0.111	0.102	0.074	0.066	0.072	0.092	0.086	0.09	0.103	0.109	0.101
00:13:40	0.11	0.116	0.102	0.069	0.073	0.066	0.087	0.094	0.086	0.113	0.103	0.12
00:14:00	0.111	0.117	0.107	0.077	0.068	0.075	0.095	0.089	0.095	0.108	0.113	0.106
00:14:20	0.113	0.118	0.107	0.072	0.076	0.069	0.09	0.097	0.089	0.117	0.108	0.125
00:14:40	0.115	0.121	0.111	0.079	0.071	0.077	0.099	0.094	0.098	0.113	0.118	0.111
00:15:00	0.118	0.124	0.111	0.074	0.079	0.072	0.095	0.101	0.093	0.123	0.114	0.131
00:15:20	0.12	0.124	0.115	0.081	0.072	0.081	0.102	0.096	0.101	0.117	0.121	0.116
00:15:40	0.12	0.126	0.114	0.076	0.081	0.075	0.097	0.103	0.096	0.126	0.118	0.135
00:16:00	0.124	0.129	0.118	0.085	0.075	0.082	0.105	0.101	0.104	0.123	0.128	0.12
00:16:20	0.127	0.133	0.119	0.079	0.083	0.077	0.102	0.108	0.099	0.132	0.121	0.14
00:16:40	0.128	0.133	0.123	0.088	0.08	0.087	0.109	0.104	0.108	0.128	0.133	0.125
00:17:00	0.132	0.137	0.123	0.082	0.086	0.079	0.105	0.113	0.103	0.137	0.126	0.145
00:17:20	0.133	0.139	0.128	0.089	0.081	0.088	0.112	0.108	0.112	0.132	0.139	0.131
00:17:40	0.135	0.141	0.127	0.086	0.091	0.084	0.108	0.115	0.106	0.142	0.131	0.149
00:18:00	0.136	0.145	0.131	0.092	0.083	0.091	0.116	0.111	0.115	0.137	0.143	0.137
00:18:20	0.139	0.147	0.13	0.088	0.09	0.084	0.111	0.118	0.11	0.147	0.135	0.154
00:18:40	0.14	0.147	0.134	0.093	0.086	0.096	0.119	0.114	0.118	0.141	0.145	0.139
00:19:00	0.144	0.151	0.134	0.09	0.096	0.089	0.115	0.122	0.112	0.152	0.14	0.159
00:19:20	0.146	0.153	0.14	0.097	0.089	0.097	0.123	0.117	0.122	0.147	0.15	0.144
00:19:40	0.151	0.154	0.138	0.092	0.098	0.091	0.119	0.124	0.116	0.155	0.147	0.164
00:20:00	0.149	0.156	0.143	0.101	0.091	0.1	0.126	0.119	0.124	0.15	0.154	0.149
[Table:TABLE Delta OD Corr. ]
Time	D1	D2	D3	D4	D5	D6	D7	D8	D9	D10	D11	D12
00:00:00							0.027	0.041	0.023	0.026	0.018	0.017
00:00:20							0.044	0.055	0.036	0.027	0.02	0.021
00:00:40							0.037	0.052	0.026	0.024	0.019	0.022
00:01:00							0.049	0.044	0.035	0.021	0.017	0.019		Calculating the Slope for the raw D by Grafpad software
00:01:20							0.035	0.037	0.025	0.022	0.02	0.02		Best-fit values	Too few points	Too few points	Too few points	Too few points	Too few points	Too few points
00:01:40							0.042	0.032	0.033	0.023	0.019	0.022		Slope							0.2166 ± 0.007258	0.1971 ± 0.007055	0.1356 ± 0.006886	0.2362 ± 0.002989	0.1679 ± 0.002313	0.2009 ± 0.001915
00:02:00							0.036	0.037	0.026	0.024	0.02	0.022		Y-intercept when X=0.0							0.02978 ± 0.001403	0.03035 ± 0.001363	0.02361 ± 0.001331	0.01694 ± 0.0005777	0.01450 ± 0.0004470	0.01536 ± 0.0003701
00:02:20							0.041	0.033	0.032	0.025	0.021	0.024		X-intercept when Y=0.0							-0.1375	-0.154	-0.1741	-0.07174	-0.08637	-0.07646
00:02:40							0.037	0.04	0.028	0.025	0.023	0.023		1/slope							4.617	5.075	7.373	4.234	5.955	4.978
00:03:00							0.043	0.035	0.034	0.029	0.021	0.026		95% Confidence Intervals
00:03:20							0.036	0.039	0.026	0.029	0.025	0.026		Slope							0.2021 to 0.2311	0.1829 to 0.2112	0.1218 to 0.1494	0.2302 to 0.2422	0.1633 to 0.1726	0.1970 to 0.2047
00:03:40							0.046	0.037	0.036	0.032	0.024	0.029		Y-intercept when X=0.0							0.02698 to 0.03259	0.02763 to 0.03308	0.02095 to 0.02627	0.01579 to 0.01810	0.01361 to 0.01540	0.01462 to 0.01610
00:04:00							0.038	0.042	0.027	0.033	0.027	0.029		X-intercept when Y=0.0							-0.1604 to -0.1174	-0.1798 to -0.1316	-0.2140 to -0.1413	-0.07842 to -0.06536	-0.09404 to -0.07908	-0.08155 to -0.07155
00:04:20							0.048	0.038	0.037	0.034	0.024	0.03		Goodness of Fit
00:04:40							0.041	0.044	0.03	0.035	0.029	0.031		R square							0.9379	0.9297	0.868	0.9906	0.9889	0.9947
00:05:00							0.051	0.041	0.039	0.035	0.026	0.032		Sy.x							0.005545	0.00539	0.005261	0.002284	0.001767	0.001463
00:05:20							0.042	0.046	0.03	0.038	0.031	0.033		Is slope significantly non-zero?
00:05:40							0.053	0.044	0.039	0.038	0.028	0.033		F							890.7	780.2	387.9	6243	5272	11003
00:06:00							0.045	0.049	0.032	0.04	0.033	0.035		DFn, DFd							1.000, 59.00	1.000, 59.00	1.000, 59.00	1.000, 59.00	1.000, 59.00	1.000, 59.00
00:06:20							0.055	0.047	0.041	0.04	0.03	0.035		P value							< 0.0001	< 0.0001	< 0.0001	< 0.0001	< 0.0001	< 0.0001
00:06:40							0.046	0.051	0.033	0.043	0.034	0.037		Deviation from zero?							Significant	Significant	Significant	Significant	Significant	Significant
00:07:00							0.056	0.048	0.041	0.042	0.03	0.038		Data
00:07:20							0.048	0.051	0.033	0.044	0.036	0.041		Number of X values							61	61	61	61	61	61
00:07:40							0.06	0.051	0.043	0.047	0.033	0.04		Maximum number of Y replicates							1	1	1	1	1	1
00:08:00							0.051	0.055	0.034	0.047	0.036	0.041		Total number of values							61	61	61	61	61	61
00:08:20							0.061	0.053	0.044	0.049	0.036	0.042		Number of missing values							0	0	0	0	0	0
00:08:40							0.055	0.056	0.036	0.049	0.038	0.042
00:09:00							0.065	0.057	0.048	0.052	0.038	0.045		Equation							Y = 0.2166*X + 0.02978	Y = 0.1971*X + 0.03035	Y = 0.1356*X + 0.02361	Y = 0.2362*X + 0.01694	Y = 0.1679*X + 0.01450	Y = 0.2009*X + 0.01536
00:09:20							0.057	0.059	0.038	0.052	0.041	0.044
00:09:40							0.067	0.058	0.048	0.053	0.039	0.046
00:10:00							0.059	0.059	0.039	0.054	0.042	0.046
00:10:20							0.069	0.061	0.05	0.056	0.041	0.05
00:10:40							0.06	0.064	0.041	0.058	0.046	0.051
00:11:00							0.072	0.065	0.053	0.058	0.043	0.051
00:11:20							0.065	0.066	0.043	0.06	0.047	0.052
00:11:40							0.075	0.067	0.053	0.062	0.046	0.054
00:12:00							0.068	0.068	0.045	0.061	0.049	0.055
00:12:20							0.077	0.07	0.055	0.065	0.048	0.056
00:12:40							0.071	0.071	0.046	0.065	0.051	0.056
00:13:00							0.081	0.071	0.056	0.068	0.05	0.058
00:13:20							0.071	0.073	0.047	0.068	0.053	0.057
00:13:40							0.082	0.072	0.059	0.072	0.051	0.061
00:14:00							0.076	0.076	0.05	0.071	0.055	0.062
00:14:20							0.086	0.077	0.061	0.073	0.054	0.064
00:14:40							0.078	0.078	0.051	0.075	0.057	0.064
00:15:00							0.089	0.08	0.063	0.076	0.056	0.067
00:15:20							0.079	0.08	0.052	0.075	0.058	0.066
00:15:40							0.092	0.084	0.067	0.079	0.057	0.068
00:16:00							0.084	0.085	0.056	0.081	0.061	0.069
00:16:20							0.095	0.084	0.066	0.083	0.059	0.071
00:16:40							0.087	0.088	0.059	0.082	0.062	0.071
00:17:00							0.097	0.088	0.07	0.084	0.06	0.073
00:17:20							0.089	0.088	0.059	0.085	0.064	0.073
00:17:40							0.101	0.091	0.07	0.089	0.064	0.076
00:18:00							0.094	0.094	0.061	0.089	0.067	0.076
00:18:20							0.102	0.094	0.073	0.092	0.065	0.078
00:18:40							0.095	0.096	0.062	0.092	0.069	0.079
00:19:00							0.107	0.097	0.072	0.095	0.068	0.082
00:19:20							0.098	0.098	0.066	0.094	0.07	0.081
00:19:40							0.108	0.098	0.074	0.097	0.07	0.083
00:20:00							0.1	0.1	0.067	0.098	0.073	0.084
[Table:TABLE Delta OD Corr. ]
Time	E1	E2	E3	E4	E5	E6	E7	E8	E9	E10	E11	E12
00:00:00	0.047	0.047	0.054	0.049	0.045	0.047	0.022	0.02	0.023	0.046	0.048	0.045
00:00:20	0.052	0.045	0.059	0.05	0.048	0.05	0.027	0.028	0.025	0.05	0.048	0.048
00:00:40	0.051	0.051	0.059	0.052	0.051	0.051	0.027	0.029	0.027	0.051	0.051	0.05
00:01:00	0.053	0.052	0.061	0.056	0.055	0.057	0.027	0.027	0.025	0.056	0.053	0.053		Calculating the Slope for the raw E by Grafpad software
00:01:20	0.059	0.059	0.064	0.058	0.057	0.058	0.028	0.028	0.026	0.057	0.057	0.056		Best-fit values
00:01:40	0.06	0.059	0.068	0.063	0.059	0.061	0.029	0.032	0.031	0.061	0.059	0.06		Slope	0.6015 ± 0.002177	0.5963 ± 0.002044	0.6250 ± 0.002778	0.7081 ± 0.004484	0.6657 ± 0.004629	0.6757 ± 0.004789	0.4249 ± 0.003886	0.4312 ± 0.003772	0.4139 ± 0.004245	0.6373 ± 0.004942	0.6358 ± 0.004816	0.6315 ± 0.004816
00:02:00	0.062	0.063	0.069	0.065	0.064	0.063	0.033	0.032	0.034	0.062	0.064	0.062		Y-intercept when X=0.0	0.04285 ± 0.0004206	0.04221 ± 0.0003949	0.04853 ± 0.0005369	0.03848 ± 0.0008666	0.03697 ± 0.0008946	0.03810 ± 0.0009255	0.01625 ± 0.0007510	0.01629 ± 0.0007290	0.01593 ± 0.0008204	0.03818 ± 0.0009551	0.03810 ± 0.0009306	0.03745 ± 0.0009308
00:02:20	0.067	0.066	0.075	0.069	0.064	0.068	0.034	0.035	0.035	0.067	0.067	0.067		X-intercept when Y=0.0	-0.07123	-0.07079	-0.07764	-0.05434	-0.05553	-0.05639	-0.03823	-0.03779	-0.0385	-0.05991	-0.05992	-0.05931
00:02:40	0.07	0.07	0.077	0.071	0.068	0.07	0.037	0.036	0.036	0.068	0.069	0.068		1/slope	1.662	1.677	1.6	1.412	1.502	1.48	2.353	2.319	2.416	1.569	1.573	1.583
00:03:00	0.075	0.073	0.08	0.075	0.071	0.074	0.038	0.039	0.036	0.073	0.071	0.072		95% Confidence Intervals
00:03:20	0.076	0.077	0.082	0.079	0.076	0.076	0.041	0.04	0.04	0.074	0.076	0.073		Slope	0.5972 to 0.6059	0.5922 to 0.6004	0.6195 to 0.6306	0.6991 to 0.7171	0.6564 to 0.6750	0.6661 to 0.6853	0.4171 to 0.4327	0.4237 to 0.4388	0.4054 to 0.4224	0.6274 to 0.6472	0.6262 to 0.6454	0.6219 to 0.6412
00:03:40	0.078	0.077	0.086	0.081	0.076	0.08	0.041	0.043	0.041	0.078	0.077	0.077		Y-intercept when X=0.0	0.04200 to 0.04369	0.04142 to 0.04300	0.04746 to 0.04961	0.03674 to 0.04021	0.03518 to 0.03876	0.03625 to 0.03995	0.01474 to 0.01775	0.01484 to 0.01775	0.01429 to 0.01758	0.03627 to 0.04009	0.03624 to 0.03996	0.03559 to 0.03932
00:04:00	0.082	0.083	0.089	0.084	0.081	0.081	0.045	0.045	0.044	0.079	0.08	0.079		X-intercept when Y=0.0	-0.07311 to -0.06938	-0.07256 to -0.06904	-0.08001 to -0.07532	-0.05744 to -0.05131	-0.05895 to -0.05219	-0.05989 to -0.05298	-0.04246 to -0.03414	-0.04182 to -0.03388	-0.04325 to -0.03392	-0.06380 to -0.05613	-0.06371 to -0.05623	-0.06312 to -0.05560
00:04:20	0.087	0.086	0.093	0.087	0.084	0.086	0.045	0.047	0.044	0.084	0.083	0.083		Goodness of Fit
00:04:40	0.088	0.088	0.094	0.091	0.087	0.089	0.051	0.049	0.048	0.086	0.087	0.084		R square	0.9992	0.9993	0.9988	0.9976	0.9972	0.997	0.9951	0.9955	0.9938	0.9965	0.9966	0.9966
00:05:00	0.093	0.09	0.099	0.096	0.091	0.093	0.048	0.05	0.048	0.09	0.089	0.089		Sy.x	0.001663	0.001561	0.002122	0.003426	0.003537	0.003659	0.002969	0.002882	0.003243	0.003776	0.003679	0.00368
00:05:20	0.095	0.095	0.101	0.098	0.094	0.095	0.055	0.053	0.053	0.092	0.093	0.091		Is slope significantly non-zero?
00:05:40	0.099	0.097	0.106	0.103	0.097	0.1	0.054	0.055	0.053	0.097	0.095	0.096		F	76377	85129	50615	24935	20678	19908	11955	13069	9505	16628	17433	17192
00:06:00	0.1	0.101	0.108	0.106	0.102	0.103	0.059	0.058	0.058	0.098	0.1	0.098		DFn, DFd	1.000, 59.00	1.000, 59.00	1.000, 59.00	1.000, 59.00	1.000, 59.00	1.000, 59.00	1.000, 59.00	1.000, 59.00	1.000, 59.00	1.000, 59.00	1.000, 59.00	1.000, 59.00
00:06:20	0.107	0.104	0.113	0.11	0.103	0.106	0.057	0.058	0.056	0.103	0.102	0.102		P value	< 0.0001	< 0.0001	< 0.0001	< 0.0001	< 0.0001	< 0.0001	< 0.0001	< 0.0001	< 0.0001	< 0.0001	< 0.0001	< 0.0001
00:06:40	0.109	0.108	0.115	0.114	0.108	0.109	0.063	0.063	0.061	0.104	0.106	0.104		Deviation from zero?	Significant	Significant	Significant	Significant	Significant	Significant	Significant	Significant	Significant	Significant	Significant	Significant
00:07:00	0.112	0.11	0.121	0.118	0.112	0.114	0.061	0.063	0.059	0.11	0.108	0.108		Data
00:07:20	0.115	0.115	0.121	0.12	0.114	0.116	0.068	0.067	0.066	0.111	0.111	0.11		Number of X values	61	61	61	61	61	61	61	61	61	61	61	61
00:07:40	0.119	0.117	0.128	0.125	0.119	0.121	0.066	0.07	0.065	0.116	0.115	0.115		Maximum number of Y replicates	1	1	1	1	1	1	1	1	1	1	1	1
00:08:00	0.12	0.121	0.13	0.127	0.121	0.124	0.072	0.071	0.068	0.119	0.119	0.116		Total number of values	61	61	61	61	61	61	61	61	61	61	61	61
00:08:20	0.125	0.122	0.134	0.135	0.125	0.129	0.071	0.073	0.069	0.124	0.122	0.122		Number of missing values	0	0	0	0	0	0	0	0	0	0	0	0
00:08:40	0.128	0.129	0.136	0.137	0.131	0.132	0.075	0.075	0.073	0.126	0.127	0.124
00:09:00	0.132	0.131	0.141	0.142	0.134	0.137	0.076	0.079	0.074	0.131	0.129	0.129		Equation	Y = 0.6015*X + 0.04285	Y = 0.5963*X + 0.04221	Y = 0.6250*X + 0.04853	Y = 0.7081*X + 0.03848	Y = 0.6657*X + 0.03697	Y = 0.6757*X + 0.03810	Y = 0.4249*X + 0.01625	Y = 0.4312*X + 0.01629	Y = 0.4139*X + 0.01593	Y = 0.6373*X + 0.03818	Y = 0.6358*X + 0.03810	Y = 0.6315*X + 0.03745
00:09:20	0.134	0.135	0.144	0.145	0.136	0.139	0.081	0.08	0.077	0.133	0.133	0.131
00:09:40	0.14	0.136	0.149	0.149	0.14	0.143	0.08	0.082	0.078	0.137	0.136	0.135
00:10:00	0.141	0.14	0.151	0.151	0.144	0.146	0.084	0.084	0.082	0.139	0.141	0.137
00:10:20	0.145	0.142	0.156	0.156	0.145	0.149	0.086	0.088	0.083	0.143	0.142	0.142
00:10:40	0.147	0.147	0.157	0.162	0.152	0.155	0.091	0.091	0.089	0.147	0.148	0.146
00:11:00	0.152	0.148	0.163	0.167	0.157	0.159	0.089	0.092	0.088	0.153	0.15	0.149
00:11:20	0.155	0.155	0.165	0.168	0.16	0.163	0.096	0.095	0.094	0.155	0.156	0.153
00:11:40	0.159	0.156	0.171	0.173	0.163	0.165	0.096	0.098	0.093	0.158	0.157	0.157
00:12:00	0.162	0.162	0.172	0.18	0.168	0.171	0.099	0.099	0.098	0.163	0.164	0.161
00:12:20	0.167	0.163	0.176	0.183	0.171	0.174	0.101	0.104	0.098	0.167	0.165	0.167
00:12:40	0.169	0.167	0.18	0.187	0.175	0.179	0.105	0.105	0.102	0.17	0.171	0.168
00:13:00	0.174	0.17	0.185	0.191	0.179	0.183	0.106	0.109	0.105	0.174	0.174	0.172
00:13:20	0.176	0.176	0.187	0.196	0.183	0.185	0.11	0.11	0.108	0.176	0.177	0.175
00:13:40	0.18	0.177	0.193	0.199	0.188	0.192	0.111	0.114	0.113	0.183	0.181	0.181
00:14:00	0.183	0.181	0.194	0.203	0.192	0.195	0.115	0.116	0.112	0.186	0.186	0.183
00:14:20	0.188	0.184	0.2	0.208	0.197	0.199	0.116	0.12	0.112	0.19	0.189	0.188
00:14:40	0.189	0.189	0.201	0.211	0.199	0.202	0.122	0.122	0.116	0.192	0.193	0.19
00:15:00	0.194	0.191	0.208	0.216	0.203	0.207	0.122	0.127	0.116	0.198	0.197	0.196
00:15:20	0.198	0.196	0.208	0.222	0.208	0.212	0.126	0.125	0.123	0.201	0.2	0.197
00:15:40	0.201	0.199	0.214	0.224	0.21	0.214	0.126	0.129	0.122	0.205	0.204	0.203
00:16:00	0.204	0.203	0.216	0.228	0.216	0.219	0.131	0.133	0.127	0.207	0.208	0.205
00:16:20	0.208	0.206	0.221	0.233	0.219	0.223	0.133	0.136	0.128	0.213	0.211	0.211
00:16:40	0.211	0.21	0.222	0.236	0.223	0.226	0.135	0.136	0.132	0.215	0.217	0.214
00:17:00	0.215	0.212	0.228	0.244	0.227	0.232	0.137	0.139	0.132	0.222	0.221	0.219
00:17:20	0.217	0.215	0.229	0.247	0.233	0.238	0.14	0.141	0.137	0.226	0.225	0.222
00:17:40	0.221	0.22	0.235	0.249	0.234	0.239	0.143	0.145	0.139	0.229	0.227	0.226
00:18:00	0.224	0.222	0.235	0.254	0.241	0.245	0.147	0.148	0.143	0.233	0.234	0.231
00:18:20	0.229	0.225	0.242	0.256	0.243	0.248	0.148	0.151	0.144	0.237	0.235	0.235
00:18:40	0.231	0.229	0.242	0.26	0.249	0.253	0.152	0.153	0.149	0.241	0.242	0.238
00:19:00	0.236	0.231	0.248	0.265	0.251	0.255	0.154	0.157	0.149	0.245	0.244	0.243
00:19:20	0.236	0.235	0.249	0.27	0.255	0.26	0.157	0.158	0.153	0.248	0.247	0.244
00:19:40	0.24	0.238	0.255	0.274	0.261	0.266	0.158	0.162	0.162	0.254	0.252	0.251
00:20:00	0.242	0.241	0.256	0.278	0.264	0.268	0.164	0.164	0.158	0.255	0.255	0.254
[Table:TABLE Delta OD Corr. ]
Time	F1	F2	F3	F4	F5	F6	F7	F8	F9	F10	F11	F12
00:00:00							0.026	0.029	0.032	0.023	0.021	0.025
00:00:20							0.025	0.024	0.028	0.022	0.021	0.021
00:00:40							0.024	0.026	0.026	0.024	0.022	0.025
00:01:00							0.026	0.022	0.036	0.024	0.022	0.022
00:01:20							0.024	0.024	0.025	0.024	0.022	0.026		Calculating the Slope for the raw F by Grafpad software
00:01:40							0.025	0.022	0.038	0.023	0.023	0.022		Best-fit values	Too few points	Too few points	Too few points	Too few points	Too few points	Too few points
00:02:00							0.024	0.025	0.025	0.023	0.023	0.025		Slope							0.08919 ± 0.002264	0.08727 ± 0.002761	0.07263 ± 0.004044	0.1045 ± 0.001510	0.1079 ± 0.001300	0.1102 ± 0.003129
00:02:20							0.026	0.022	0.027	0.024	0.024	0.021		Y-intercept when X=0.0							0.02123 ± 0.0004375	0.02021 ± 0.0005335	0.02424 ± 0.0007815	0.02063 ± 0.0002918	0.01910 ± 0.0002512	0.02009 ± 0.0006046
00:02:40							0.025	0.026	0.025	0.025	0.022	0.026		X-intercept when Y=0.0							-0.2381	-0.2316	-0.3337	-0.1974	-0.177	-0.1823
00:03:00							0.028	0.025	0.029	0.028	0.025	0.024		1/slope							11.21	11.46	13.77	9.569	9.268	9.073
00:03:20							0.024	0.024	0.029	0.026	0.024	0.027		95% Confidence Intervals
00:03:40							0.027	0.025	0.029	0.026	0.027	0.024		Slope							0.08466 to 0.09372	0.08174 to 0.09279	0.06454 to 0.08072	0.1015 to 0.1075	0.1053 to 0.1105	0.1040 to 0.1165
00:04:00							0.026	0.026	0.027	0.029	0.024	0.029		Y-intercept when X=0.0							0.02036 to 0.02211	0.01914 to 0.02128	0.02268 to 0.02580	0.02005 to 0.02122	0.01860 to 0.01960	0.01888 to 0.02130
00:04:20							0.028	0.026	0.028	0.026	0.027	0.026		X-intercept when Y=0.0							-0.2603 to -0.2179	-0.2592 to -0.2071	-0.3975 to -0.2825	-0.2086 to -0.1868	-0.1858 to -0.1686	-0.2040 to -0.1627
00:04:40							0.026	0.027	0.027	0.031	0.027	0.031		Goodness of Fit
00:05:00							0.028	0.025	0.028	0.027	0.028	0.026		R square							0.9634	0.9442	0.8454	0.9878	0.9915	0.9546
00:05:20							0.027	0.027	0.027	0.031	0.028	0.032		Sy.x							0.00173	0.002109	0.003089	0.001154	0.000993	0.00239
00:05:40							0.029	0.026	0.028	0.028	0.029	0.028		Is slope significantly non-zero?
00:06:00							0.028	0.027	0.027	0.03	0.029	0.033		F							1552	999.2	322.6	4789	6890	1241
00:06:20							0.03	0.026	0.03	0.032	0.031	0.029		DFn, DFd							1.000, 59.00	1.000, 59.00	1.000, 59.00	1.000, 59.00	1.000, 59.00	1.000, 59.00
00:06:40							0.03	0.03	0.03	0.033	0.032	0.034		P value							< 0.0001	< 0.0001	< 0.0001	< 0.0001	< 0.0001	< 0.0001
00:07:00							0.032	0.028	0.032	0.032	0.032	0.03		Deviation from zero?							Significant	Significant	Significant	Significant	Significant	Significant
00:07:20							0.029	0.03	0.03	0.033	0.032	0.035		Data
00:07:40							0.034	0.03	0.033	0.033	0.032	0.031		Number of X values							61	61	61	61	61	61
00:08:00							0.03	0.032	0.032	0.035	0.033	0.037		Maximum number of Y replicates							1	1	1	1	1	1
00:08:20							0.033	0.03	0.034	0.034	0.034	0.032		Total number of values							61	61	61	61	61	61
00:08:40							0.033	0.033	0.032	0.036	0.034	0.038		Number of missing values							0	0	0	0	0	0
00:09:00							0.035	0.03	0.035	0.036	0.036	0.034
00:09:20							0.033	0.034	0.033	0.038	0.035	0.039		Equation							Y = 0.08919*X + 0.02123	Y = 0.08727*X + 0.02021	Y = 0.07263*X + 0.02424	Y = 0.1045*X + 0.02063	Y = 0.1079*X + 0.01910	Y = 0.1102*X + 0.02009
00:09:40							0.036	0.032	0.036	0.037	0.035	0.035
00:10:00							0.034	0.035	0.034	0.036	0.036	0.039
00:10:20							0.037	0.033	0.037	0.038	0.037	0.036
00:10:40							0.036	0.037	0.035	0.039	0.037	0.041
00:11:00							0.037	0.034	0.037	0.039	0.039	0.038
00:11:20							0.037	0.036	0.035	0.04	0.038	0.042
00:11:40							0.04	0.036	0.039	0.04	0.04	0.039
00:12:00							0.037	0.037	0.037	0.042	0.039	0.043
00:12:20							0.039	0.036	0.039	0.041	0.042	0.039
00:12:40							0.038	0.039	0.037	0.042	0.042	0.045
00:13:00							0.04	0.037	0.039	0.043	0.042	0.042
00:13:20							0.039	0.039	0.038	0.044	0.042	0.047
00:13:40							0.041	0.039	0.042	0.045	0.044	0.044
00:14:00							0.041	0.041	0.039	0.045	0.044	0.049
00:14:20							0.043	0.04	0.043	0.044	0.045	0.043
00:14:40							0.042	0.042	0.04	0.046	0.044	0.049
00:15:00							0.045	0.041	0.043	0.045	0.046	0.045
00:15:20							0.043	0.044	0.041	0.048	0.047	0.051
00:15:40							0.044	0.041	0.044	0.047	0.048	0.047
00:16:00							0.044	0.045	0.044	0.048	0.048	0.053
00:16:20							0.048	0.043	0.045	0.05	0.05	0.049
00:16:40							0.045	0.045	0.043	0.05	0.049	0.052
00:17:00							0.048	0.045	0.047	0.051	0.05	0.05
00:17:20							0.047	0.047	0.045	0.052	0.05	0.055
00:17:40							0.05	0.047	0.048	0.052	0.052	0.051
00:18:00							0.048	0.048	0.047	0.053	0.052	0.055
00:18:20							0.05	0.047	0.049	0.053	0.053	0.052
00:18:40							0.049	0.048	0.047	0.054	0.054	0.057
00:19:00							0.053	0.049	0.052	0.054	0.055	0.054
00:19:20							0.051	0.052	0.049	0.056	0.053	0.059
00:19:40							0.053	0.051	0.053	0.055	0.056	0.055
00:20:00							0.052	0.053	0.051	0.056	0.054	0.058
Final Figure 1A data
	Sak			Sak4			Erf			Redbeta			Chimeric 16-17			pCN51 empty
	Sample 1	Sample 2	Sample 3	Sample 1	Sample 2	Sample 3	Sample 1	Sample 2	Sample 3	Sample 1	Sample 2	Sample 3	Sample 1	Sample 2	Sample 3	Sample 1	Sample 2	Sample 3
NT3	37.3074	31.2	37.438	19.3422	26.8549	19.3937	26.46	19.8014	15.2601	42.8715	27.8345	40.2753	18.3704	20.8914	20.3728	21.2281	20.5509	17.4797
IT3	78.4	88.0042	80.7638	85.3958	87.2889	81.9183	63.8994	64.2743	57.0667	71.5343	78.4	78.1822	10.8892	14.6361	11.5018	13.2349	14.2307	10.9989
	Statistics by using grafpad software
	Within each row, compare columns (simple effects within rows)
	Number of families	2
	Number of comparisons per family	5
	Alpha	0.05
	Sidak's multiple comparisons test	Mean Diff.	95% CI of diff.	Significant?	Summary	Adjusted P Value
	NT180 min
	Chimeric 16-17 vs. Sak	-15.44	-24.83 to -6.041	Yes	***	0.0006
	Chimeric 16-17 vs. Sak4	-1.985	-11.38 to 7.411	No	ns	0.9837
	Chimeric 16-17 vs. Erf	-0.6289	-10.02 to 8.767	No	ns	> 0.9999
	Chimeric 16-17 vs. Redbeta	-17.12	-26.51 to -7.720	Yes	***	0.0002
	Chimeric 16-17 vs. pCN51 empty	0.1253	-9.271 to 9.521	No	ns	> 0.9999
	IT180 min
	Chimeric 16-17 vs. Sak	-70.05	-79.44 to -60.65	Yes	****	< 0.0001
	Chimeric 16-17 vs. Sak4	-72.53	-81.92 to -63.13	Yes	****	< 0.0001
	Chimeric 16-17 vs. Erf	-49.4	-58.80 to -40.01	Yes	****	< 0.0001
	Chimeric 16-17 vs. Redbeta	-63.7	-73.09 to -54.30	Yes	****	< 0.0001
	Chimeric 16-17 vs. pCN51 empty	-0.4791	-9.875 to 8.917	No	ns	> 0.9999
	Test details	Mean 1	Mean 2	Mean Diff.	SE of diff.	N1	N2	t	DF
	NT180 min
	Chimeric 16-17 vs. Sak	19.88	35.32	-15.44	3.37	3	3	4.581	24
	Chimeric 16-17 vs. Sak4	19.88	21.86	-1.985	3.37	3	3	0.5891	24
	Chimeric 16-17 vs. Erf	19.88	20.51	-0.6289	3.37	3	3	0.1866	24
	Chimeric 16-17 vs. Redbeta	19.88	36.99	-17.12	3.37	3	3	5.079	24
	Chimeric 16-17 vs. pCN51 empty	19.88	19.75	0.1253	3.37	3	3	0.03718	24
	IT180 min
	Chimeric 16-17 vs. Sak	12.34	82.39	-70.05	3.37	3	3	20.79	24
	Chimeric 16-17 vs. Sak4	12.34	84.87	-72.53	3.37	3	3	21.52	24
	Chimeric 16-17 vs. Erf	12.34	61.75	-49.4	3.37	3	3	14.66	24
	Chimeric 16-17 vs. Redbeta	12.34	76.04	-63.7	3.37	3	3	18.9	24
	Chimeric 16-17 vs. pCN51 empty	12.34	12.82	-0.4791	3.37	3	3	0.1422	24
