# Supplementary material for: Pirating conserved phage mechanisms promotes promiscuous staphylococcal pathogenicity island transfer
Source: eLife journal article supplement (doi:10.7554/elife.26487), 2017-08-08
Supplement: supp [file elife-26487-supp-v1.zip › elife_poa_e26487_Figure_6_source_data_2.xlsx]

## Sheet: Raw data of figure 6C
Raw data of figure 6C
	Sample 1									Miller Units
		Sak	Sak4	Erf	Redβ	Chim	Zip Control positive	Control negative
	OD600	0.43	0.44	0.43	0.39	0.41	0.21	0.45		264.994	223.086	113.066	210.02	42.6829	1251.32	50.5848
	Time (min)	38	38	38	38	38	18	38
	OD420	0.44	0.38	0.19	0.32	0.07	0.48	0.09
	OD550	0.004	0.004	0.003	0.005	0.002	0.004	0.002
	Sample 2
		Sak	Sak4	Erf	Redβ	Chim	Zip Control positive	Control negative
	OD600	0.41	0.44	0.38	0.42	0.45	0.31	0.43		342.105	217.105	107.168	214.912	44.7368	1167.11	59.0575
	Time (min)	38	38	38	38	38	18	38
	OD420	0.54	0.37	0.16	0.35	0.08	0.66	0.1
	OD550	0.004	0.004	0.003	0.004	0.002	0.005	0.002
	Sample 3
		Sak	Sak4	Erf	Redβ	Chim	Zip Control positive	Control negative
	OD600	0.41	0.4	0.42	0.37	0.41	0.33	0.45		245.828	224.507	109.492	221.373	49.1014	1116.16	56.4327
	Time (min)	38	38	38	38	38	18	38
	OD420	0.39	0.35	0.18	0.32	0.08	0.67	0.1
	OD550	0.004	0.005	0.003	0.005	0.002	0.004	0.002
	Raw data of figure 6C
	Statistics by using Grafpad software
	Number of families	1
	Number of comparisons per family	5
	Alpha	0.05
	Sidak's multiple comparisons test	Mean Diff.	95% CI of diff.	Significant?	Summary	Adjusted P Value
	Chimeric 16-17 phi80alpha vs. Sak (80alpha)	-0.792	-1.314 to -0.2704	Yes	*	0.0221
	Chimeric 16-17 phi80alpha vs. Sak4 (52A)	-0.6881	-0.8531 to -0.5231	Yes	**	0.003
	Chimeric 16-17 phi80alpha vs. Erf (SLT)	-0.3836	-0.5966 to -0.1705	Yes	*	0.0158
	Chimeric 16-17 phi80alpha vs. Redbeta (N315)	-0.6759	-0.7872 to -0.5646	Yes	**	0.0014
	Chimeric 16-17 phi80alpha vs. Control Negative	-0.08494	-0.2642 to 0.09429	No	ns	0.198
	Test details	Mean 1	Mean 2	Mean Diff.	SE of diff.	n1	n2	t	DF
	Chimeric 16-17 phi80alpha vs. Sak (80alpha)	1.657	2.449	-0.792	0.05311	3	3	14.91	2
	Chimeric 16-17 phi80alpha vs. Sak4 (52A)	1.657	2.345	-0.6881	0.0168	3	3	40.96	2
	Chimeric 16-17 phi80alpha vs. Erf (SLT)	1.657	2.041	-0.3836	0.02169	3	3	17.68	2
	Chimeric 16-17 phi80alpha vs. Redbeta (N315)	1.657	2.333	-0.6759	0.01133	3	3	59.66	2
	Chimeric 16-17 phi80alpha vs. Control Negative	1.657	1.742	-0.08494	0.01825	3	3	4.655	2
