# Supplementary material for: Pirating conserved phage mechanisms promotes promiscuous staphylococcal pathogenicity island transfer
Source: eLife journal article supplement (doi:10.7554/elife.26487), 2017-08-08
Supplement: supp [file elife-26487-supp-v1.zip › elife_poa_e26487_Table_1_source_data_1.xlsx]

## Sheet: Data of table 1
Data after adding CdCl2 related to table 1
	SaPIbov1						ShoCI1						ShaCI1
pCN51	0.183661	0.034726	0.191927	0.088193	0.140226		0.341246	0.18321	0.160065	0.189372	-0.00042		0.05446	0.057691	0.065769	-0.0757	-0.01928
NM1	4.45251	8.45413	6.03287	4.08804	6.79486		7.51478	7.75074	6.47849	6.62728	8.21215		1.8197	1.60365	1.79925	1.62394	1.70886
O11	4.81247	4.578	7.5253	3.51391	3.37489		6.78735	9.78575	6.97071	8.20915	8.3865		1.89823	1.84864	2.24166	1.91777	2.64671
IPLA6	5.75106	6.0509	8.19712	6.94817	6.19594		5.31671	6.17865	6.85949	6.36051	5.88182		2.28299	1.62169	1.92829	2.50843	1.63747
11	14.5411	14.5411	18.5427	17.284	13.4364		14.3532	20.1697	14.511	21.0865	14.6689		1.18358	2.71584	2.2101	3.49588	2.61214
	all measured as Units/ml
Statisitics using two way ANOVA
	Within each column, compare rows (simple effects within columns)										Table Analyzed	Data 1
	Number of families	3									Two-way ANOVA	Ordinary
	Number of comparisons per family	4									Alpha	0.05
	Alpha	0.05
											Source of Variation	% of total variation	P value	P value summary	Significant?
	Holm-Sidak's multiple comparisons test	Mean Diff.	Significant?	Summary	Adjusted P Value						Interaction	17.95	< 0.0001	****	Yes
											Phage Dut	50.84	< 0.0001	****	Yes
	SaPIbov1										Stl homologue	25.99	< 0.0001	****	Yes
	pCN51 vs. NM1	-5.837	Yes	****	< 0.0001
	pCN51 vs. O11	-4.633	Yes	****	< 0.0001						ANOVA table	SS	DF	MS	F (DFn, DFd)	P value
	pCN51 vs. IPLA6	-6.501	Yes	****	< 0.0001						Interaction	360.9	8	45.11	F (8, 60) = 25.79	P < 0.0001
	pCN51 vs. 11	-15.54	Yes	****	< 0.0001						Phage Dut	1022	4	255.6	F (4, 60) = 146.1	P < 0.0001
											Stl homologue	522.5	2	261.3	F (2, 60) = 149.4	P < 0.0001
	ShoCI1										Residual	105	60	1.749
	pCN51 vs. NM1	-7.142	Yes	****	< 0.0001
	pCN51 vs. O11	-7.853	Yes	****	< 0.0001						Number of missing values	0
	pCN51 vs. IPLA6	-5.945	Yes	****	< 0.0001
	pCN51 vs. 11	-16.78	Yes	****	< 0.0001
	ShaCI1
	pCN51 vs. NM1	-1.694	Yes	*	0.0472
	pCN51 vs. O11	-2.094	Yes	*	0.0444
	pCN51 vs. IPLA6	-1.979	Yes	*	0.0444
	pCN51 vs. 11	-2.427	Yes	*	0.0206
	Test details	Mean 1	Mean 2	Mean Diff.	SE of diff.	N1	N2	t	DF
	SaPIbov1
	pCN51 vs. NM1	0.1277	5.964	-5.837	0.8365	5	5	6.978	60
	pCN51 vs. O11	0.1277	4.761	-4.633	0.8365	5	5	5.539	60
	pCN51 vs. IPLA6	0.1277	6.629	-6.501	0.8365	5	5	7.772	60
	pCN51 vs. 11	0.1277	15.67	-15.54	0.8365	5	5	18.58	60
	ShoCI1
	pCN51 vs. NM1	0.1747	7.317	-7.142	0.8365	5	5	8.538	60
	pCN51 vs. O11	0.1747	8.028	-7.853	0.8365	5	5	9.388	60
	pCN51 vs. IPLA6	0.1747	6.119	-5.945	0.8365	5	5	7.107	60
	pCN51 vs. 11	0.1747	16.96	-16.78	0.8365	5	5	20.06	60
	ShaCI1
	pCN51 vs. NM1	0.01659	1.711	-1.694	0.8365	5	5	2.026	60
	pCN51 vs. O11	0.01659	2.111	-2.094	0.8365	5	5	2.503	60
	pCN51 vs. IPLA6	0.01659	1.996	-1.979	0.8365	5	5	2.366	60
	pCN51 vs. 11	0.01659	2.444	-2.427	0.8365	5	5	2.901	60
