# Supplementary material for: Pirating conserved phage mechanisms promotes promiscuous staphylococcal pathogenicity island transfer
Source: eLife journal article supplement (doi:10.7554/elife.26487), 2017-08-08
Supplement: supp [file elife-26487-supp-v1.zip › elife_poa_e26487_Table_2_source_data_1.xlsx]

## Sheet: Data of table 2
		Data of table 2.
		All data was collected after adding CdCl2		SaPI2			SeCINIHLM095			ShaCI1			SsCIUMC-CNS990
				With CdCl2			With CdCl2			With CdCl2			With CdCl2
				Expermint No. 1	Expermint No. 2	Expermint No. 3	Expermint No. 1	Expermint No. 2	Expermint No. 3	Expermint No. 1	Expermint No. 2	Expermint No. 3	Expermint No. 1	Expermint No. 2	Expermint No. 3
			ORF16 phi80alpha	10.3208	7.48806	5.35654	7.27314	8.63724	5.93818	6.04673	7.29966	10.2009	0.661	1.34184	0.459003
			ORF16 phi52A	14.3923	12.6285	10.9475	0.235564	1.83466	0.033433	0.398651	0.297315	0.594269	10.907	9.22063	13.5208
			ORF17 phiSLT	8.91403	7.44237	6.02836	7.23126	7.8563	4.47377	1.6002	0.10474	0.679487	0.613206	1.143	0.268368
			ORFRS10305 phiN315	3.6869	3.54983	4.53288	0.448623	0.639978	0.649277	0.349708	0.300723	0.349708	0.380102	0.201124	0.174042
			ORF46 phi15 S. epi.	7.14592	9.13527	6.45154	6.50149	10.0947	7.05411	10.2844	4.94879	5.18617	0.895912	0.054106	0.647474
			ORFchimera 16-17 phi80a	0.935109	0.874607	0.454043	0.861261	0.28097	0.626282	0.578488	0.432987	0.459454	0.396465	0.183782	0.286674
			pCN51 empty	1.07228	0.966347	0.721486	0.200779	0.647991	0.689991	1.26564	0.474333	0.410952	0.46261	0.088103	0.346732
				Units/ml
	Statistics based on two-way ANOVA	Within each column, compare rows (simple effects within columns)
	using Graphpad Prism 6 software
	P= <0.01	Number of families	4
		Number of comparisons per family	6							Tabular results	Table Analyzed	Unrelated SSAPs induce PICIs 2
		Alpha	0.01
											Two-way ANOVA	Ordinary
		Holm-Sidak's multiple comparisons test	Mean Diff.	Significant?	Summary	Adjusted P Value					Alpha	0.05
		SaPI2									Source of Variation	% of total variation	P value	P value summary	Significant?
		ORFchimera 16-17 phi80a vs. ORF16 phi80alpha	-6.96721	Yes	****	<0.0001					Interaction	42.8397	< 0.0001	****	Yes
		ORFchimera 16-17 phi80a vs. ORF16 phi52A	-11.9015	Yes	****	<0.0001					Row Factor	36.6755	< 0.0001	****	Yes
		ORFchimera 16-17 phi80a vs. ORF17 phiSLT	-6.707	Yes	****	<0.0001					Column Factor	13.9438	< 0.0001	****	Yes
		ORFchimera 16-17 phi80a vs. ORFRS10305 phiN315	-3.16862	Yes	**	0.0057
		ORFchimera 16-17 phi80a vs. ORF46 phi15 S. epi.	-6.82299	Yes	****	<0.0001					ANOVA table	SS	DF	MS	F (DFn, DFd)	P value
		ORFchimera 16-17 phi80a vs. pCN51 empty	-0.16545	No	ns	0.8712					Interaction	567.545	18	31.5303	F (18, 56) = 20.3759	P < 0.0001
											Row Factor	485.882	6	80.9803	F (6, 56) = 52.3320	P < 0.0001
		SeCINIHLM095									Column Factor	184.729	3	61.5764	F (3, 56) = 39.7926	P < 0.0001
		ORFchimera 16-17 phi80a vs. ORF16 phi80alpha	-6.69335	Yes	****	<0.0001					Residual	86.6562	56	1.54743
		ORFchimera 16-17 phi80a vs. ORF16 phi52A	-0.111714	No	ns	0.9993
		ORFchimera 16-17 phi80a vs. ORF17 phiSLT	-5.93094	Yes	****	<0.0001					Number of missing values	0
		ORFchimera 16-17 phi80a vs. ORFRS10305 phiN315	0.0102117	No	ns	0.9993
		ORFchimera 16-17 phi80a vs. ORF46 phi15 S. epi.	-7.29393	Yes	****	<0.0001
		ORFchimera 16-17 phi80a vs. pCN51 empty	0.076584	No	ns	0.9993
		ShaCI1
		ORFchimera 16-17 phi80a vs. ORF16 phi80alpha	-7.35879	Yes	****	<0.0001
		ORFchimera 16-17 phi80a vs. ORF16 phi52A	0.0602313	No	ns	0.997
		ORFchimera 16-17 phi80a vs. ORF17 phiSLT	-0.304498	No	ns	0.997
		ORFchimera 16-17 phi80a vs. ORFRS10305 phiN315	0.15693	No	ns	0.997
		ORFchimera 16-17 phi80a vs. ORF46 phi15 S. epi.	-6.31614	Yes	****	<0.0001
		ORFchimera 16-17 phi80a vs. pCN51 empty	-0.226665	No	ns	0.997
		SsCIUMC-CNS990
		ORFchimera 16-17 phi80a vs. ORF16 phi80alpha	-0.53164	No	ns	0.9901
		ORFchimera 16-17 phi80a vs. ORF16 phi52A	-10.9272	Yes	****	<0.0001
		ORFchimera 16-17 phi80a vs. ORF17 phiSLT	-0.385884	No	ns	0.9925
		ORFchimera 16-17 phi80a vs. ORFRS10305 phiN315	0.0372177	No	ns	0.9992
		ORFchimera 16-17 phi80a vs. ORF46 phi15 S. epi.	-0.243524	No	ns	0.9933
		ORFchimera 16-17 phi80a vs. pCN51 empty	-0.0101747	No	ns	0.9992
		Test details	Mean 1	Mean 2	Mean Diff.	SE of diff.	N1	N2	t	DF
		SaPI2
		ORFchimera 16-17 phi80a vs. ORF16 phi80alpha	0.754586	7.7218	-6.96721	1.01569	3	3	6.8596	56
		ORFchimera 16-17 phi80a vs. ORF16 phi52A	0.754586	12.6561	-11.9015	1.01569	3	3	11.7177	56
		ORFchimera 16-17 phi80a vs. ORF17 phiSLT	0.754586	7.46159	-6.707	1.01569	3	3	6.60341	56
		ORFchimera 16-17 phi80a vs. ORFRS10305 phiN315	0.754586	3.9232	-3.16862	1.01569	3	3	3.11968	56
		ORFchimera 16-17 phi80a vs. ORF46 phi15 S. epi.	0.754586	7.57758	-6.82299	1.01569	3	3	6.71761	56
		ORFchimera 16-17 phi80a vs. pCN51 empty	0.754586	0.920036	-0.16545	1.01569	3	3	0.162895	56
		SeCINIHLM095
		ORFchimera 16-17 phi80a vs. ORF16 phi80alpha	0.589504	7.28285	-6.69335	1.01569	3	3	6.58997	56
		ORFchimera 16-17 phi80a vs. ORF16 phi52A	0.589504	0.701219	-0.111714	1.01569	3	3	0.109989	56
		ORFchimera 16-17 phi80a vs. ORF17 phiSLT	0.589504	6.52044	-5.93094	1.01569	3	3	5.83933	56
		ORFchimera 16-17 phi80a vs. ORFRS10305 phiN315	0.589504	0.579293	0.0102117	1.01569	3	3	0.0100539	56
		ORFchimera 16-17 phi80a vs. ORF46 phi15 S. epi.	0.589504	7.88343	-7.29393	1.01569	3	3	7.18127	56
		ORFchimera 16-17 phi80a vs. pCN51 empty	0.589504	0.51292	0.076584	1.01569	3	3	0.0754011	56
		ShaCI1
		ORFchimera 16-17 phi80a vs. ORF16 phi80alpha	0.49031	7.8491	-7.35879	1.01569	3	3	7.24513	56
		ORFchimera 16-17 phi80a vs. ORF16 phi52A	0.49031	0.430078	0.0602313	1.01569	3	3	0.059301	56
		ORFchimera 16-17 phi80a vs. ORF17 phiSLT	0.49031	0.794808	-0.304498	1.01569	3	3	0.299795	56
		ORFchimera 16-17 phi80a vs. ORFRS10305 phiN315	0.49031	0.33338	0.15693	1.01569	3	3	0.154506	56
		ORFchimera 16-17 phi80a vs. ORF46 phi15 S. epi.	0.49031	6.80645	-6.31614	1.01569	3	3	6.21858	56
		ORFchimera 16-17 phi80a vs. pCN51 empty	0.49031	0.716975	-0.226665	1.01569	3	3	0.223164	56
		SsCIUMC-CNS990
		ORFchimera 16-17 phi80a vs. ORF16 phi80alpha	0.288974	0.820614	-0.53164	1.01569	3	3	0.523429	56
		ORFchimera 16-17 phi80a vs. ORF16 phi52A	0.288974	11.2161	-10.9272	1.01569	3	3	10.7584	56
		ORFchimera 16-17 phi80a vs. ORF17 phiSLT	0.288974	0.674857	-0.385884	1.01569	3	3	0.379923	56
		ORFchimera 16-17 phi80a vs. ORFRS10305 phiN315	0.288974	0.251756	0.0372177	1.01569	3	3	0.0366428	56
		ORFchimera 16-17 phi80a vs. ORF46 phi15 S. epi.	0.288974	0.532497	-0.243524	1.01569	3	3	0.239762	56
		ORFchimera 16-17 phi80a vs. pCN51 empty	0.288974	0.299148	-0.0101747	1.01569	3	3	0.0100175	56
